# Supplementary material
Source: MDPI journal article supplement (https://www.mdpi.com/2073-4344/13/4/760)

# An unprecedented reactivity of D-A cyclopropane derivatives: decyanation reaction

Giorgiana Denisa Bisag,<sup>1</sup> Pietro Viola,<sup>1</sup> Luca Bernardi,<sup>1,\*</sup> Mariafrancesca Fochi<sup>1,\*</sup>

## Supporting information

### Selected NMR spectra

|                                                                                                             |     |
|-------------------------------------------------------------------------------------------------------------|-----|
| 1-acetyl-2-phenylcyclopropane-1-carbonitrile <b>4aa</b> ( <sup>1</sup> H, <sup>13</sup> C, Cosy, HSQC, NOE) | S1  |
| 1-acetyl-2-(4-bromophenyl)cyclopropane-1-carbonitrile <b>4ba</b> ( <sup>1</sup> H, <sup>13</sup> C)         | S6  |
| 1-acetyl-2-(2-bromophenyl)cyclopropane-1-carbonitrile <b>4ca</b> ( <sup>1</sup> H, <sup>13</sup> C)         | S7  |
| 1-acetyl-2-(3-chlorophenyl)cyclopropane-1-carbonitrile <b>4da</b> ( <sup>1</sup> H, <sup>13</sup> C)        | S8  |
| 1-acetyl-2-(2-chlorophenyl)cyclopropane-1-carbonitrile <b>4ea</b> ( <sup>1</sup> H, <sup>13</sup> C)        | S9  |
| 1-acetyl-2-(4-chlorophenyl)cyclopropane-1-carbonitrile <b>4fa</b> ( <sup>1</sup> H, <sup>13</sup> C)        | S10 |
| 1-acetyl-2-(3-nitrophenyl)cyclopropane-1-carbonitrile <b>4ga</b> ( <sup>1</sup> H, <sup>13</sup> C)         | S11 |
| 1-acetyl-2-(p-tolyl)cyclopropane-1-carbonitrile <b>4ha</b> ( <sup>1</sup> H, <sup>13</sup> C)               | S12 |
| 1-acetyl-2-(4-isopropylphenyl)cyclopropane-1-carbonitrile <b>4ia</b> ( <sup>1</sup> H, <sup>13</sup> C)     | S13 |
| 1-acetyl-2-(4-methoxyphenyl)cyclopropane-1-carbonitrile <b>4ja</b> ( <sup>1</sup> H, <sup>13</sup> C)       | S14 |
| 1-acetyl-2-(naphthalen-2-yl)cyclopropane-1-carbonitrile <b>4ka</b> ( <sup>1</sup> H, <sup>13</sup> C)       | S15 |
| S-(3,3-dicyano-1-phenylpropyl) ethanethioate <b>3aa</b> ( <sup>1</sup> H, <sup>13</sup> C)                  | S16 |
| S-(1-(4-bromophenyl)-3,3-dicyanopropyl) ethanethioate <b>3ba</b> ( <sup>1</sup> H, <sup>13</sup> C)         | S17 |
| S-(1-(3-chlorophenyl)-3,3-dicyanopropyl) ethanethioate <b>3da</b> ( <sup>1</sup> H, <sup>13</sup> C)        | S18 |
| S-(1-(4-chlorophenyl)-3,3-dicyanopropyl) ethanethioate <b>3fa</b> ( <sup>1</sup> H, <sup>13</sup> C)        | S19 |
| S-(3,3-dicyano-1-(3-nitrophenyl)propyl) ethanethioate <b>3ga</b> ( <sup>1</sup> H, <sup>13</sup> C)         | S20 |
| S-(3,3-dicyano-1-(p-tolyl)propyl) ethanethioate <b>3ha</b> ( <sup>1</sup> H, <sup>13</sup> C)               | S21 |
| S-(3,3-dicyano-1-(4-isopropylphenyl)propyl) ethanethioate <b>3ia</b> ( <sup>1</sup> H, <sup>13</sup> C)     | S22 |
| S-(3,3-dicyano-1-(4-methoxyphenyl)propyl) ethanethioate <b>3ja</b> ( <sup>1</sup> H, <sup>13</sup> C)       | S23 |
| S-(3,3-dicyano-1-phenylpropyl) benzothioate <b>3ab</b> ( <sup>1</sup> H, <sup>13</sup> C)                   | S24 |
| S-(3,3-dicyano-1-(4-methoxyphenyl)propyl) benzothioate <b>3jb</b> ( <sup>1</sup> H, <sup>13</sup> C)        | S25 |

# 1-acetyl-2-phenylcyclopropane-1-carbonitrile 4aa

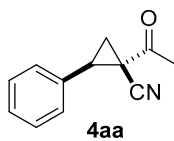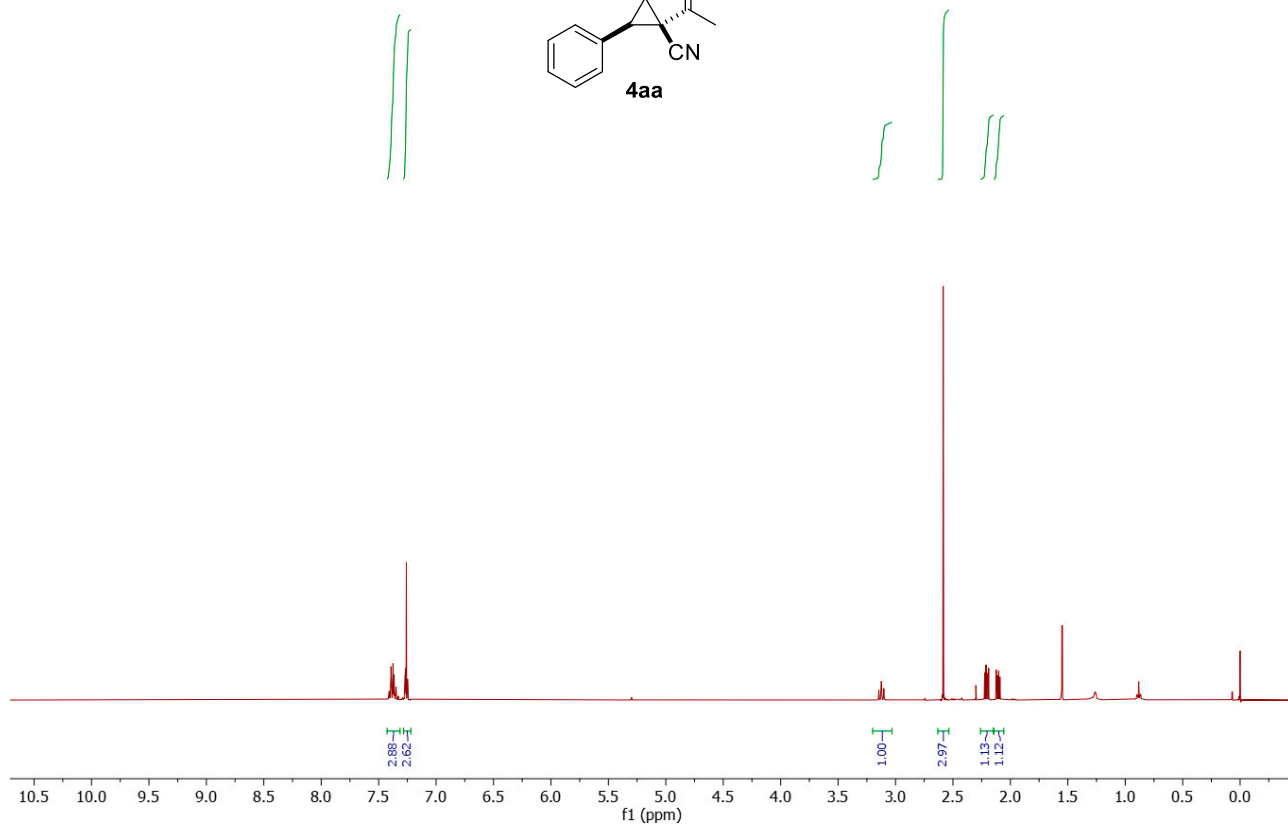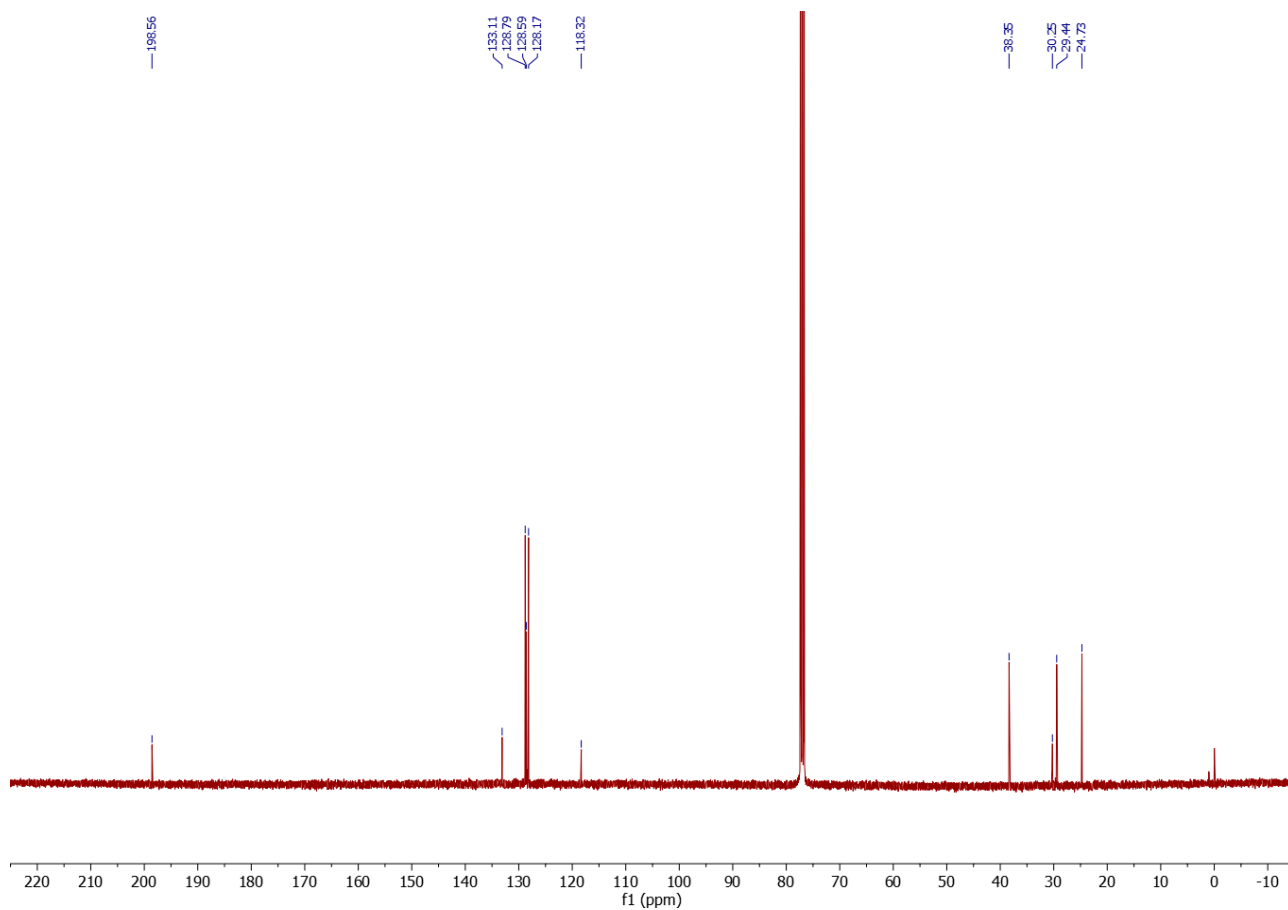



Irradiation of the H<sub>a</sub> at 2.21 ppm gave NOE effect on the signal at 2.58 ppm assigned to CH<sub>3</sub>, on the signal at 2.11 assigned to H<sub>b</sub> and on the signal at 3.12 ppm assigned to H<sub>c</sub>.

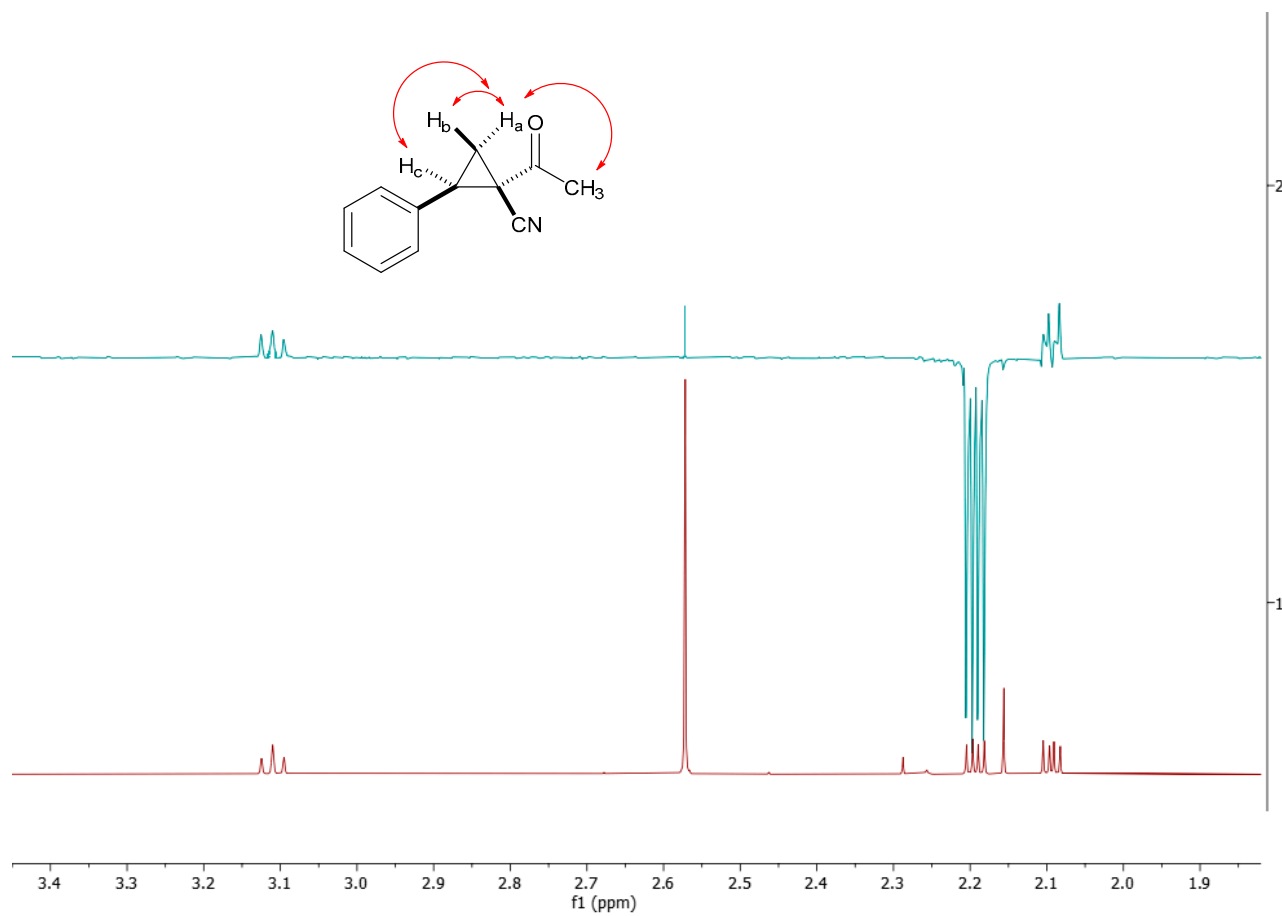

Irradiation of the H<sub>b</sub> at 2.11 ppm gave NOE effect on the signal at 2.21 assigned to H<sub>a</sub>, on the signal at 3.12 ppm assigned to H<sub>c</sub> and on the signal at 7.20 ppm of the *ortho*-aromatic protons.

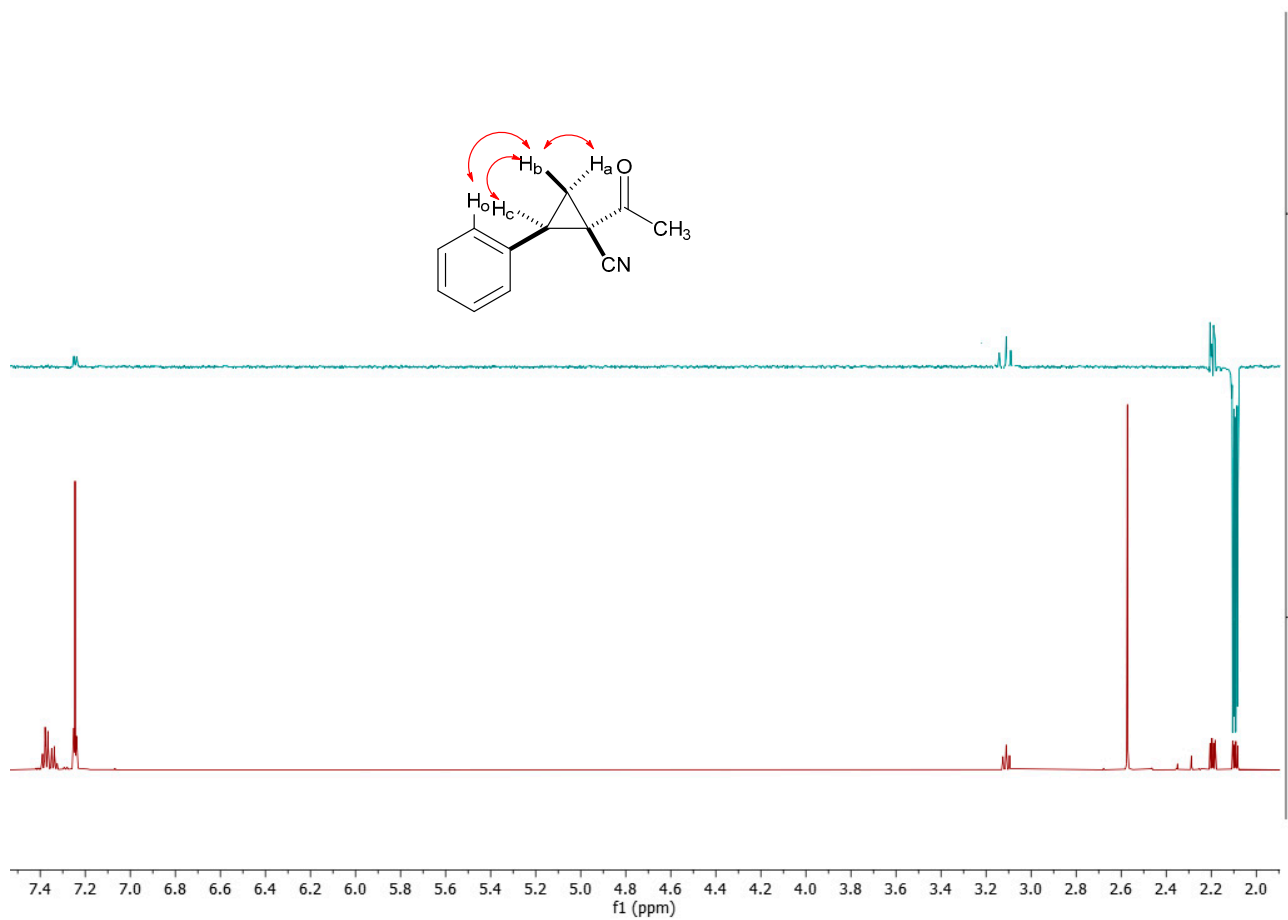

Irradiation of the H<sub>c</sub> at 3.12 ppm gave NOE effect on the signal at 2.58 ppm assigned to CH<sub>3</sub>, on the signal at 2.21 assigned to H<sub>a</sub> and on the signal at 7.20 ppm of the *ortho*-aromatic protons.

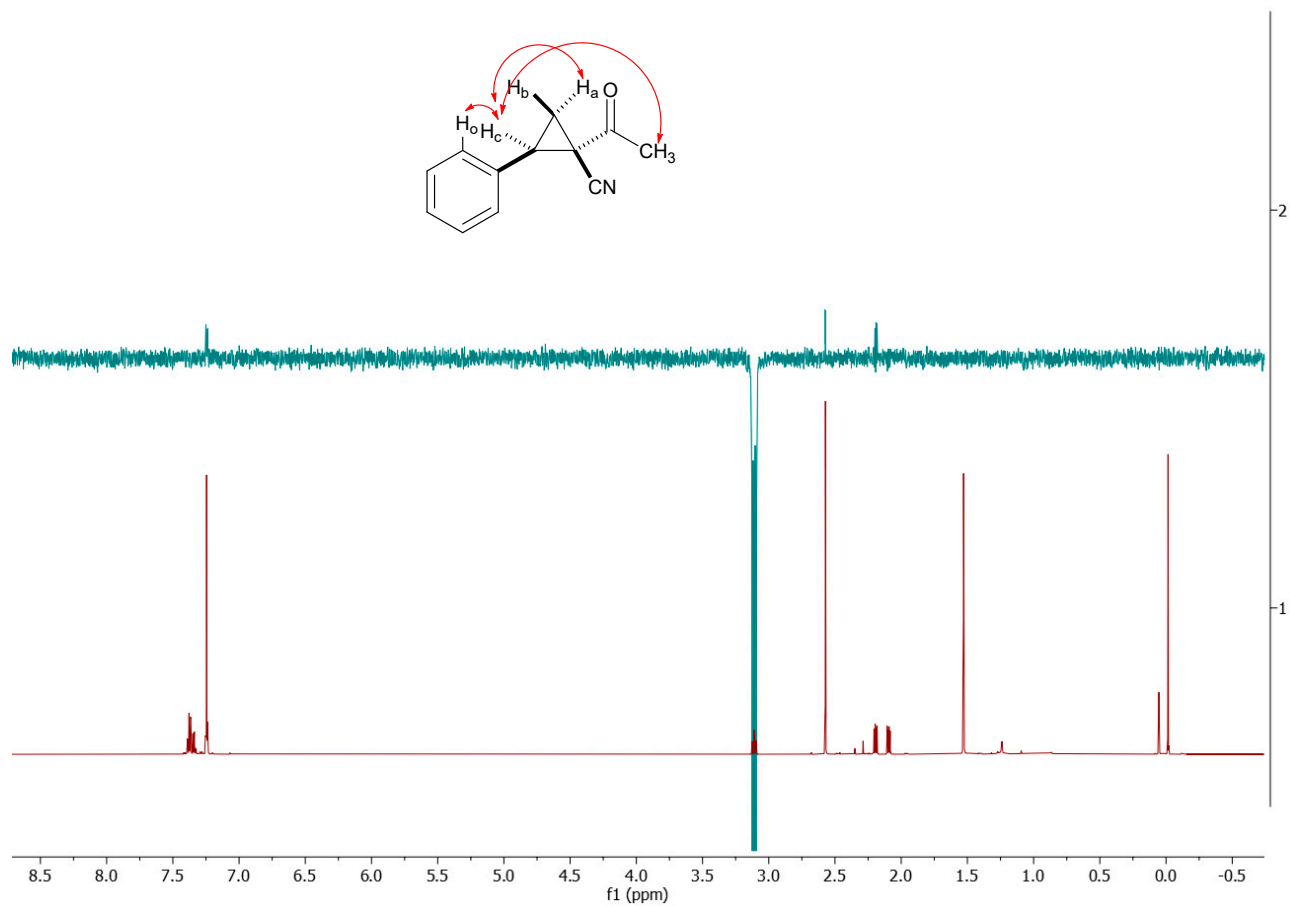

These results indicate a *cis*-relationship between H<sub>c</sub> and CH<sub>3</sub> and thus, ultimately, a *trans* configuration of product **4aa**.

1-acetyl-2-(4-bromophenyl)cyclopropane-1-carbonitrile 4ba

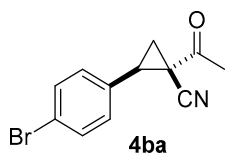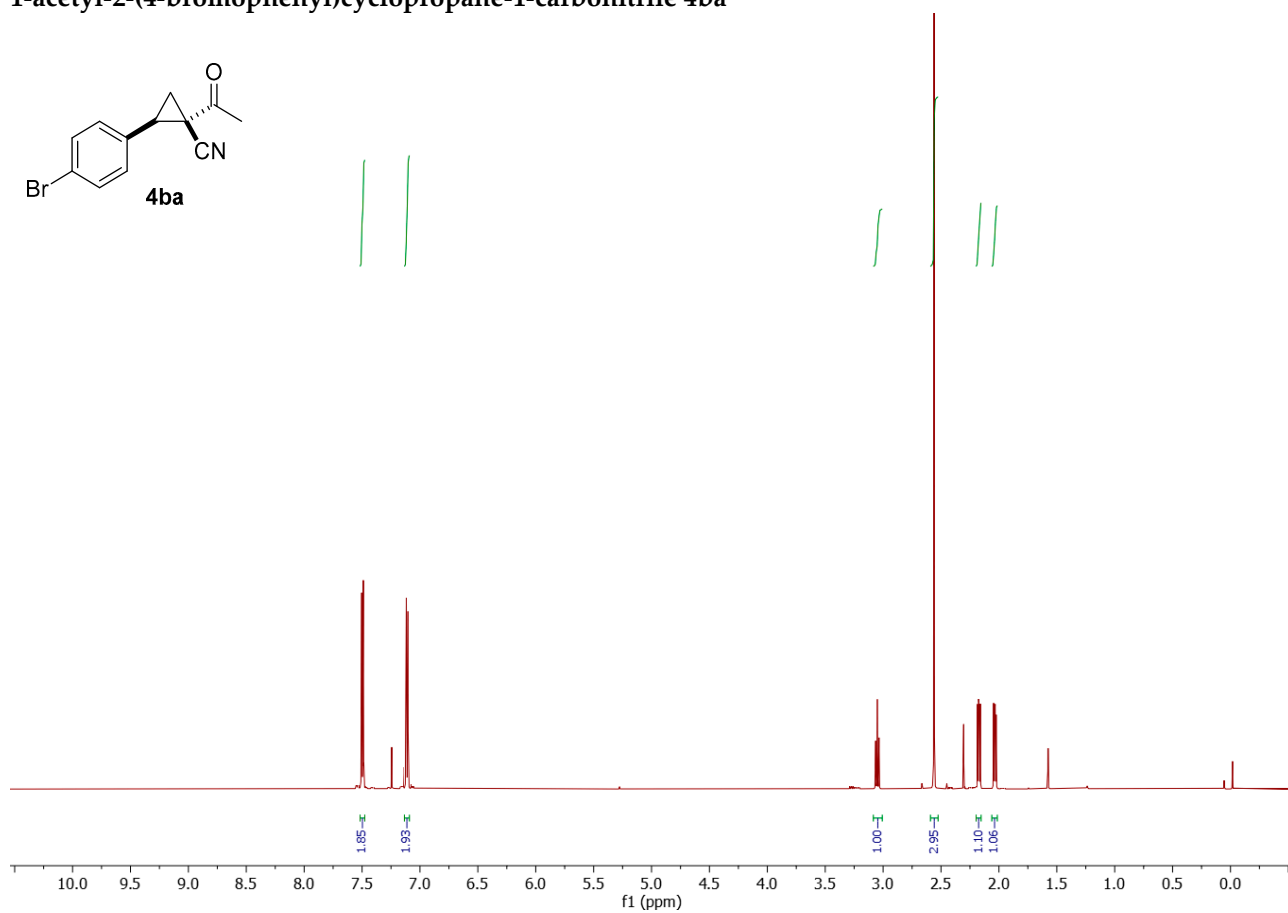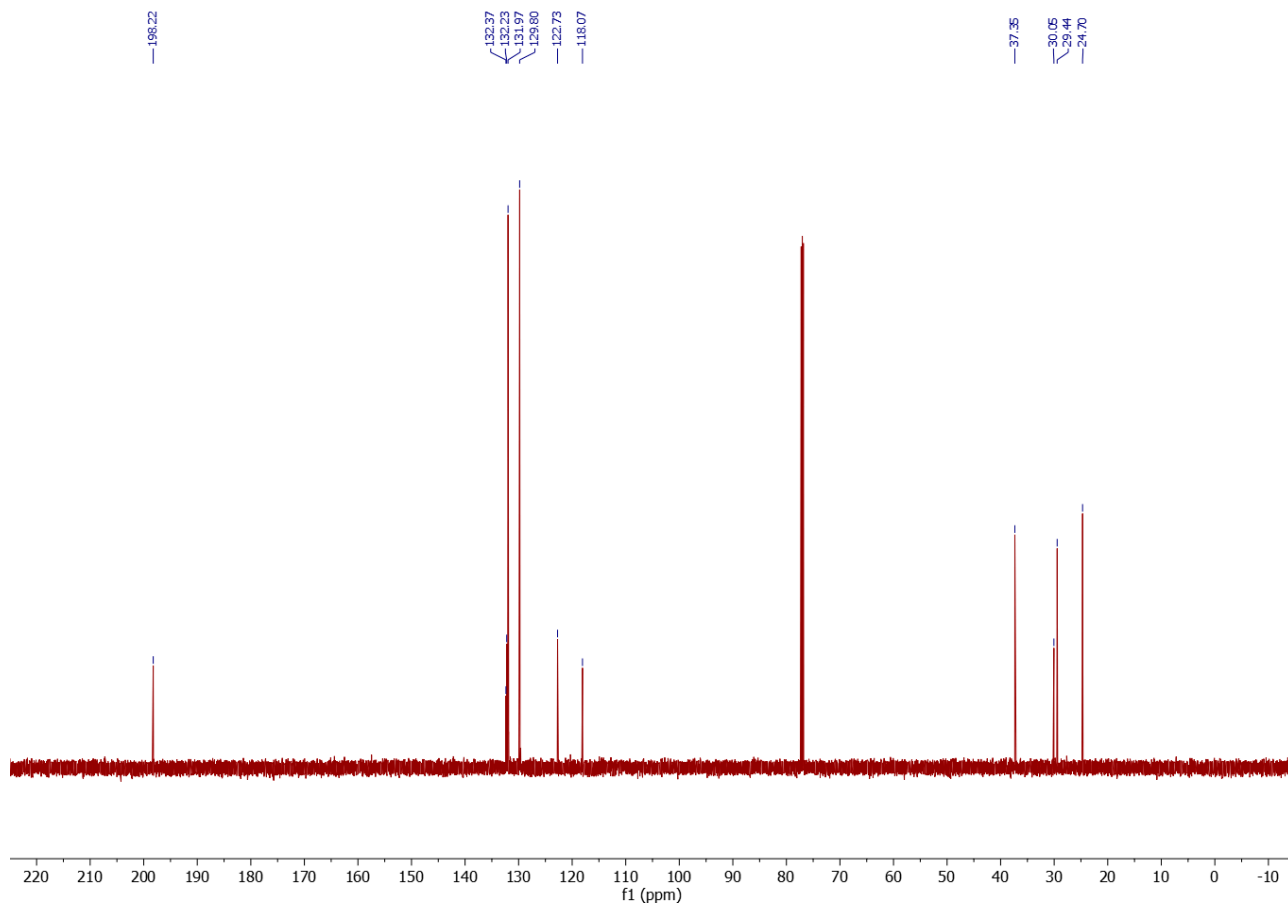

1-acetyl-2-(2-bromophenyl)cyclopropane-1-carbonitrile 4ca

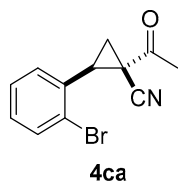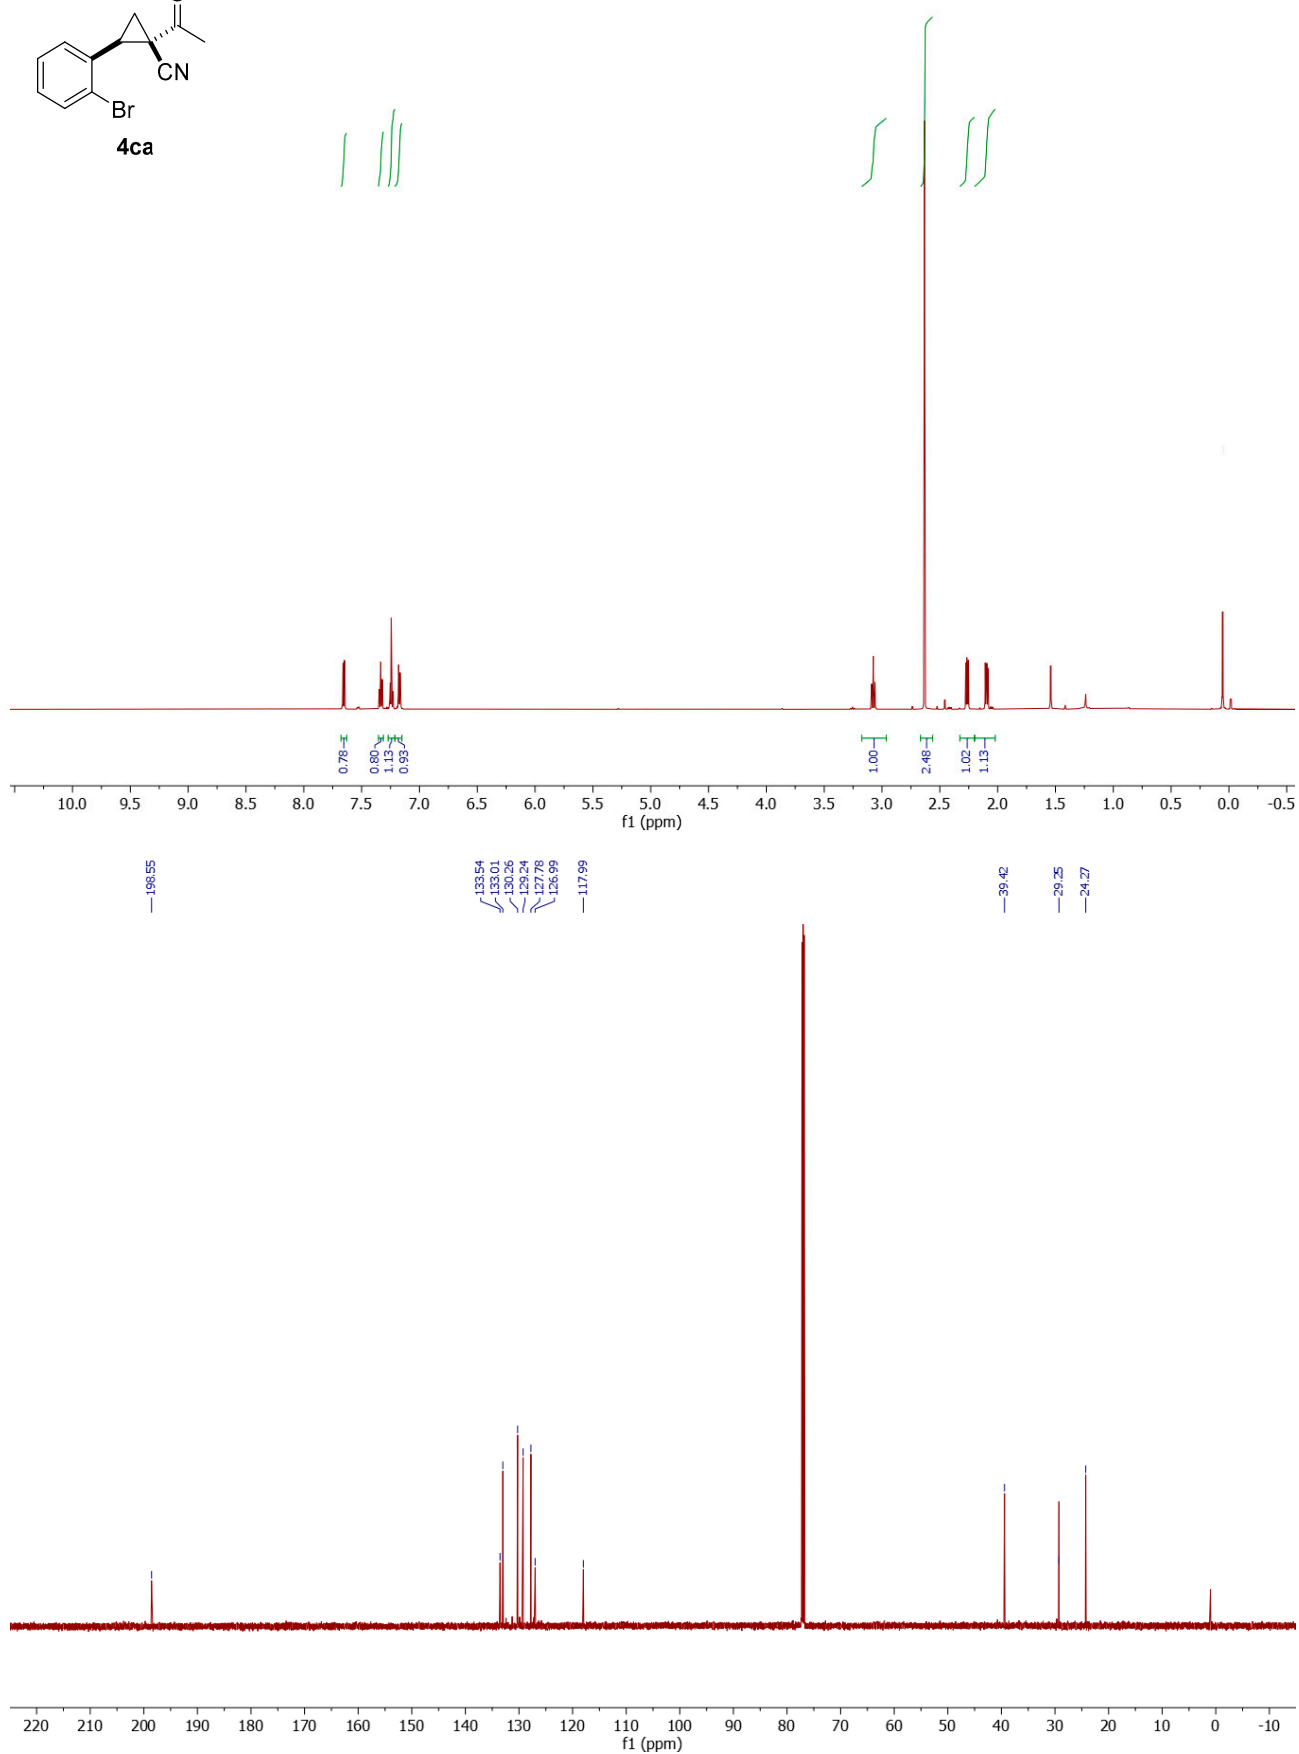



1-acetyl-2-(3-chlorophenyl)cyclopropane-1-carbonitrile 4da

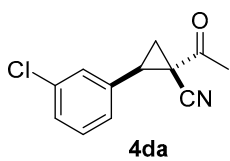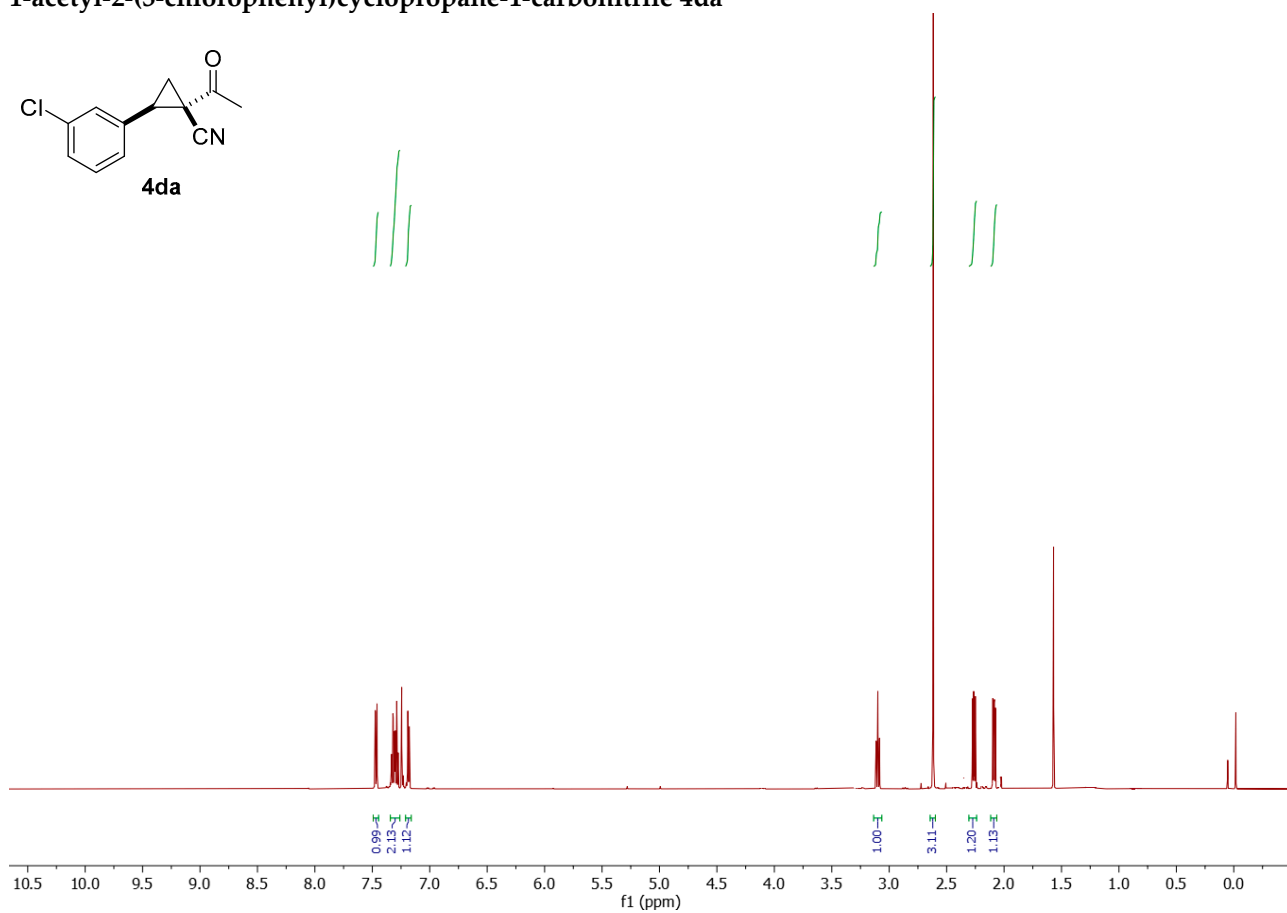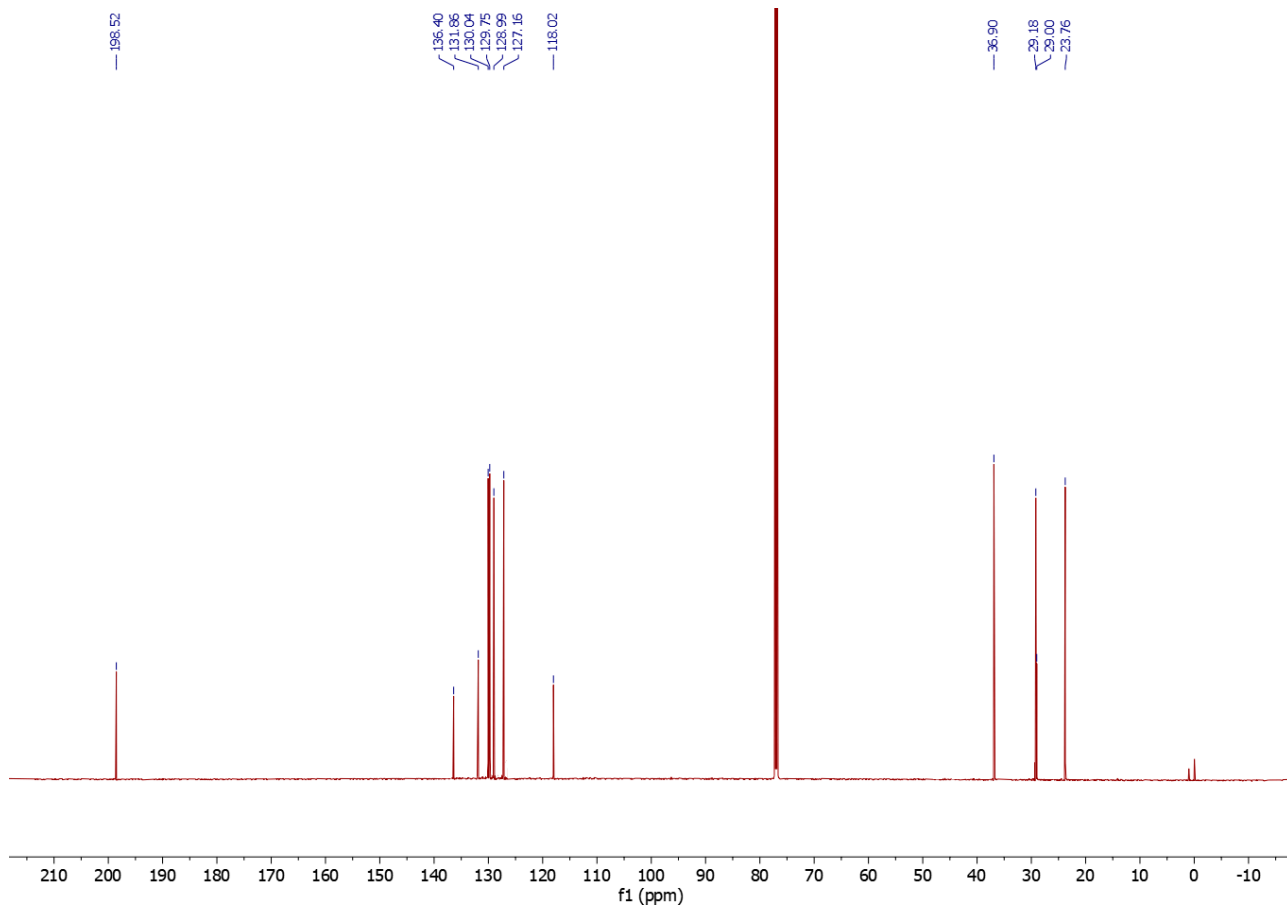

1-acetyl-2-(2-chlorophenyl)cyclopropane-1-carbonitrile 4ea

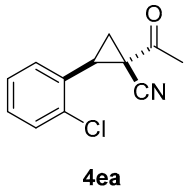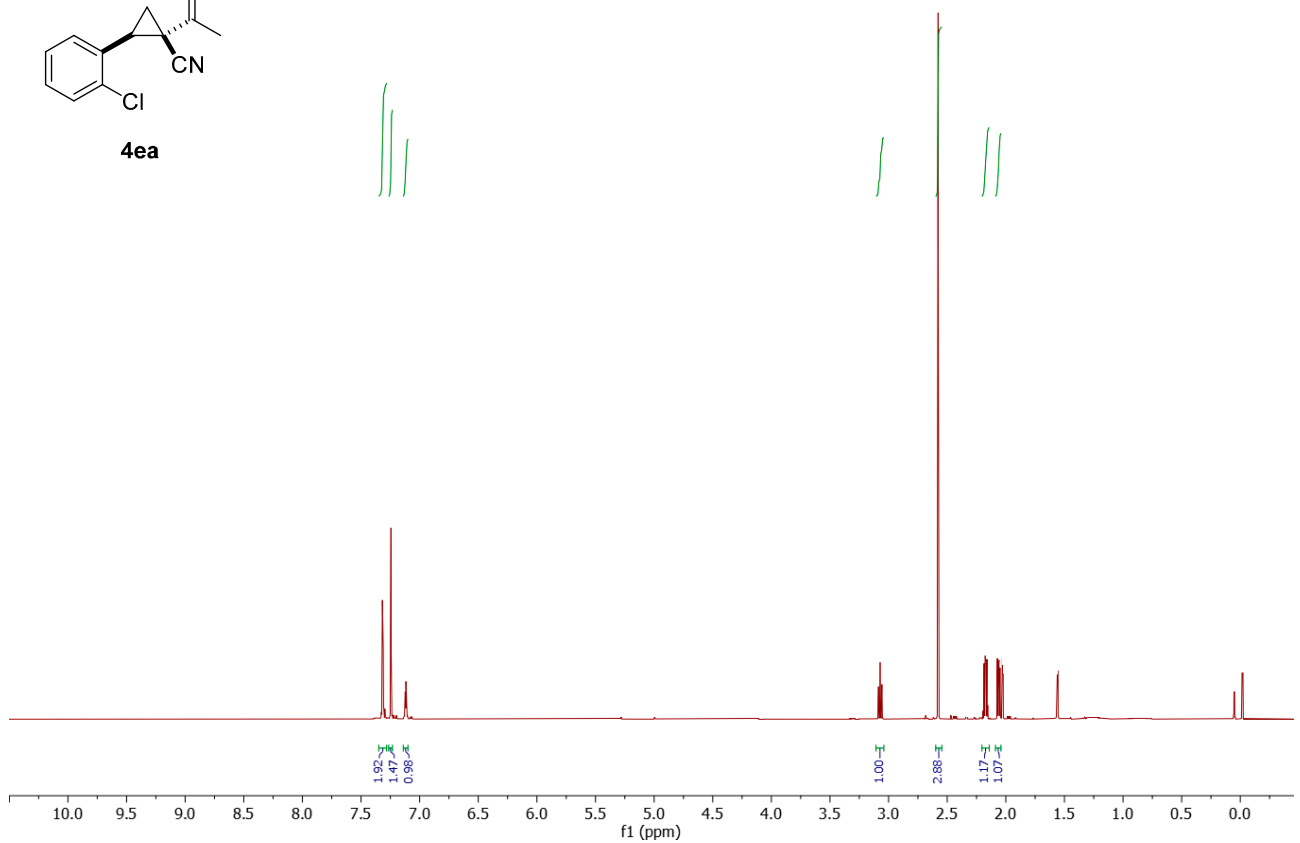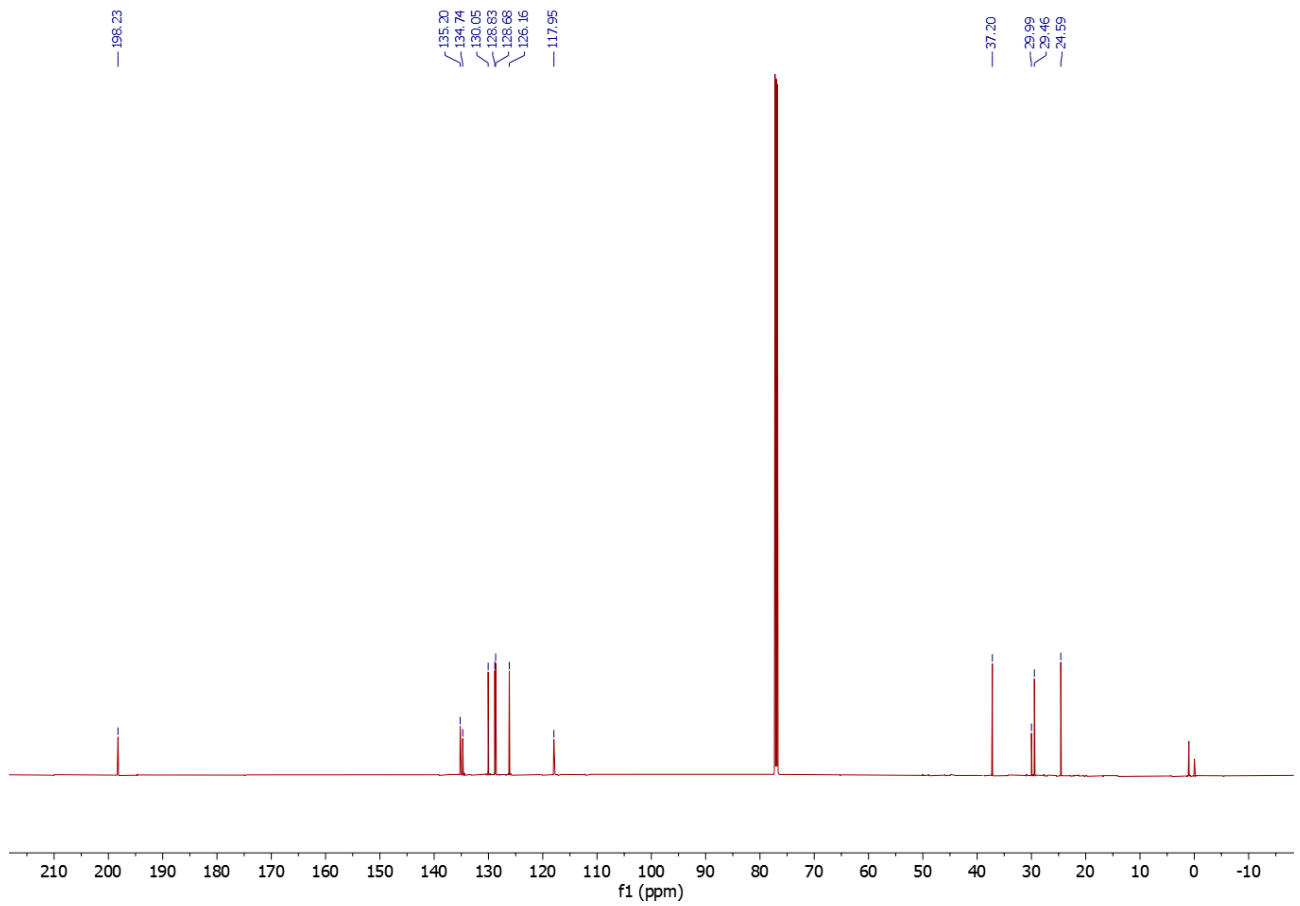

1-acetyl-2-(4-chlorophenyl)cyclopropane-1-carbonitrile 4fa

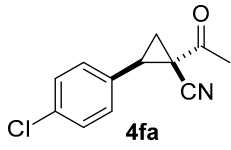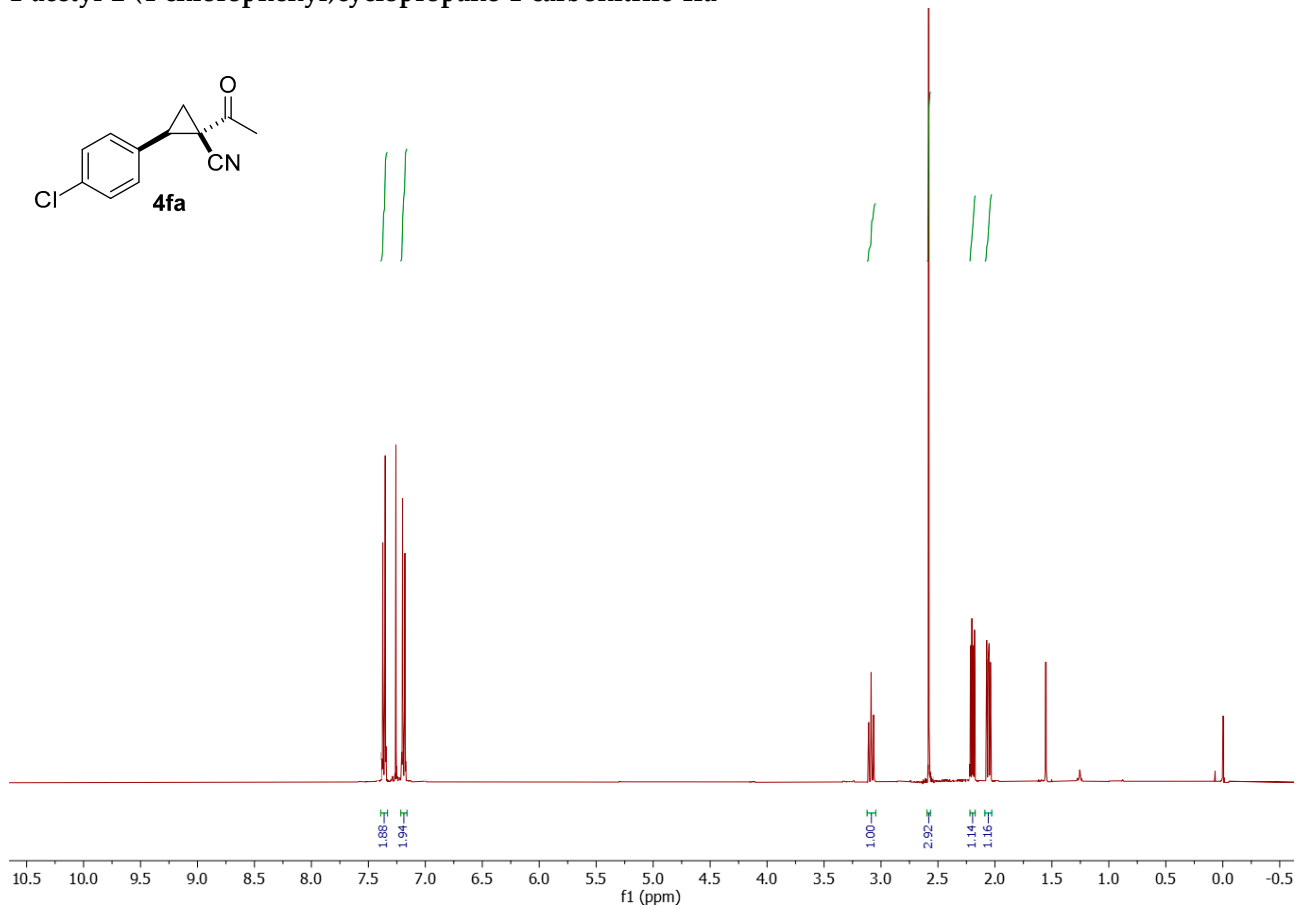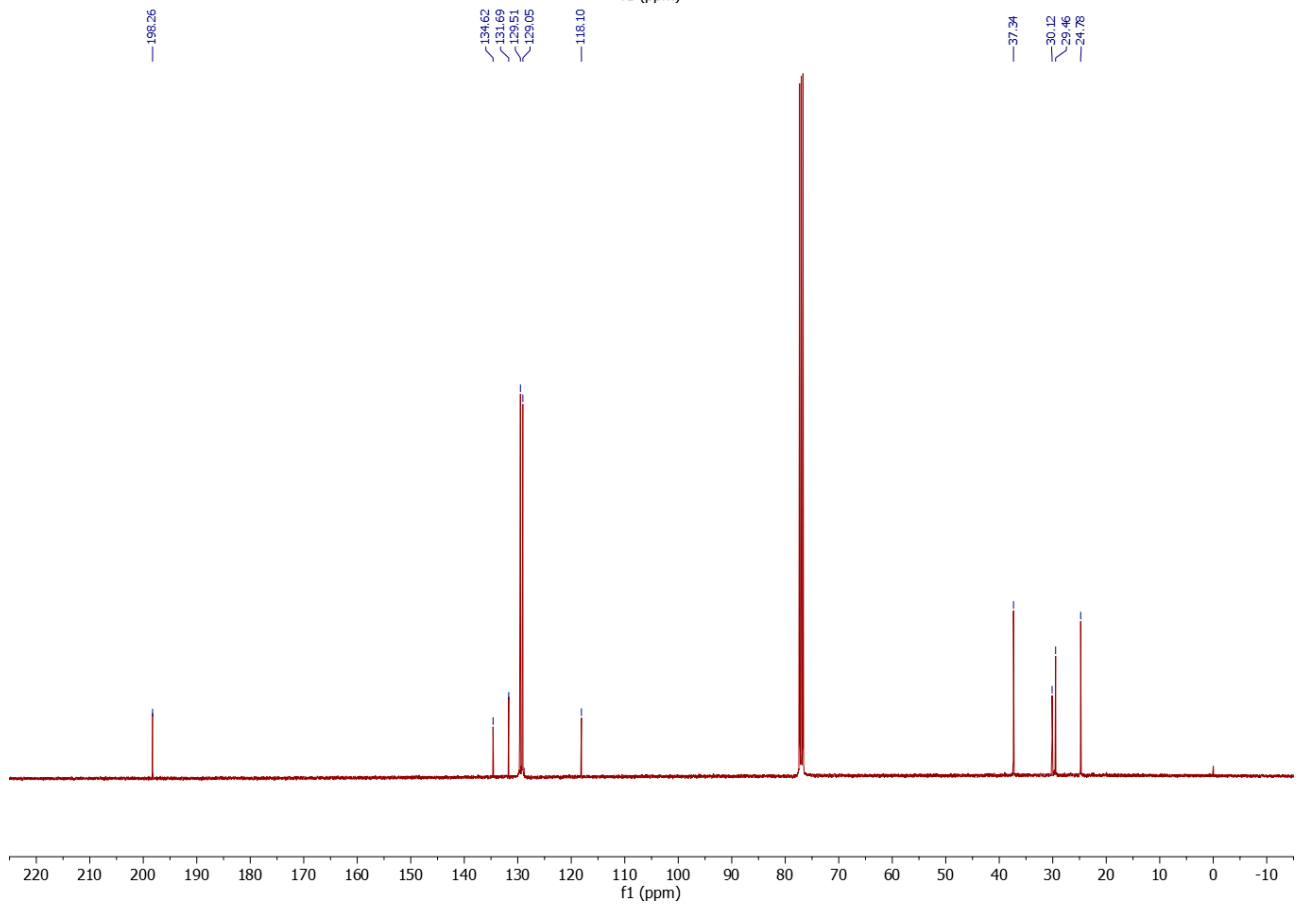

1-acetyl-2-(3-nitrophenyl)cyclopropane-1-carbonitrile 4ga

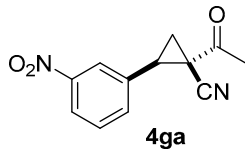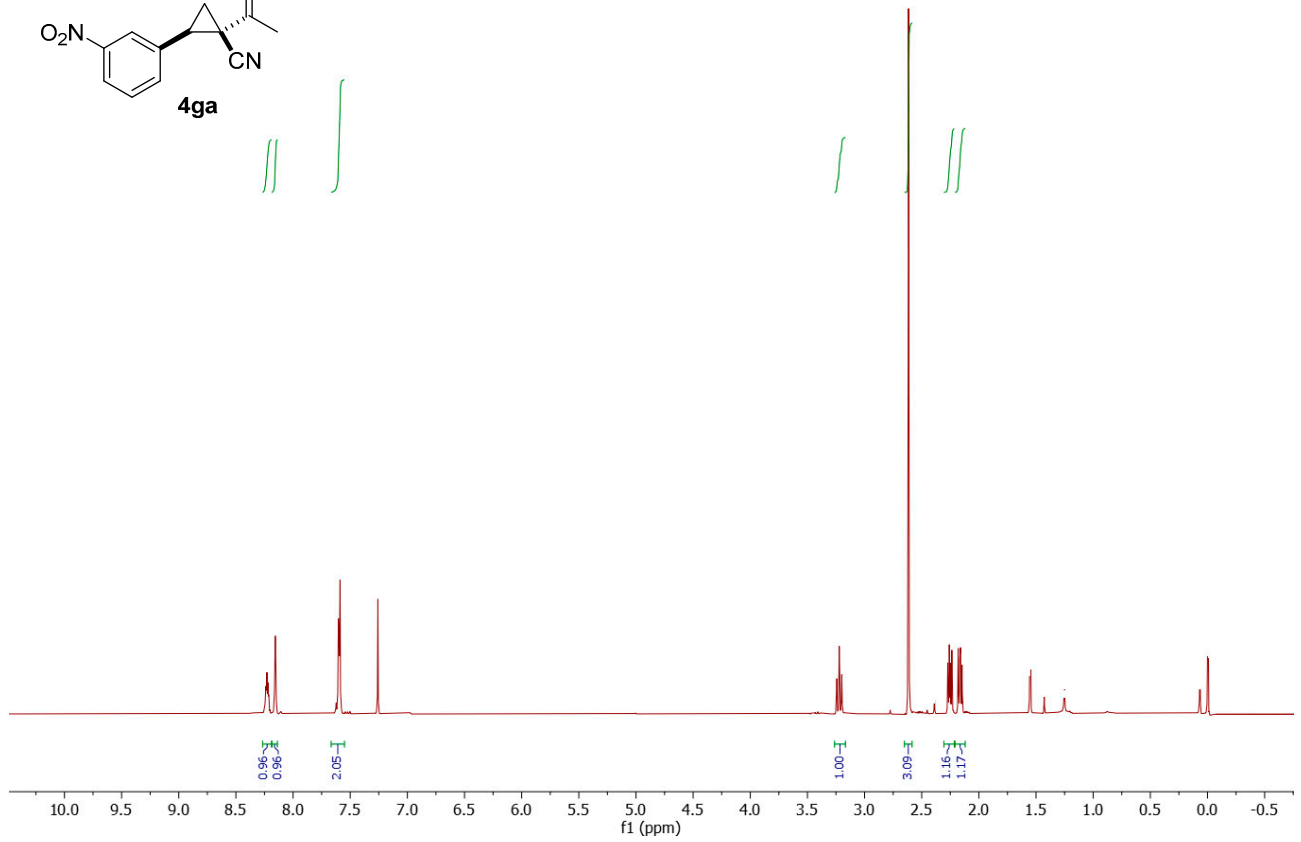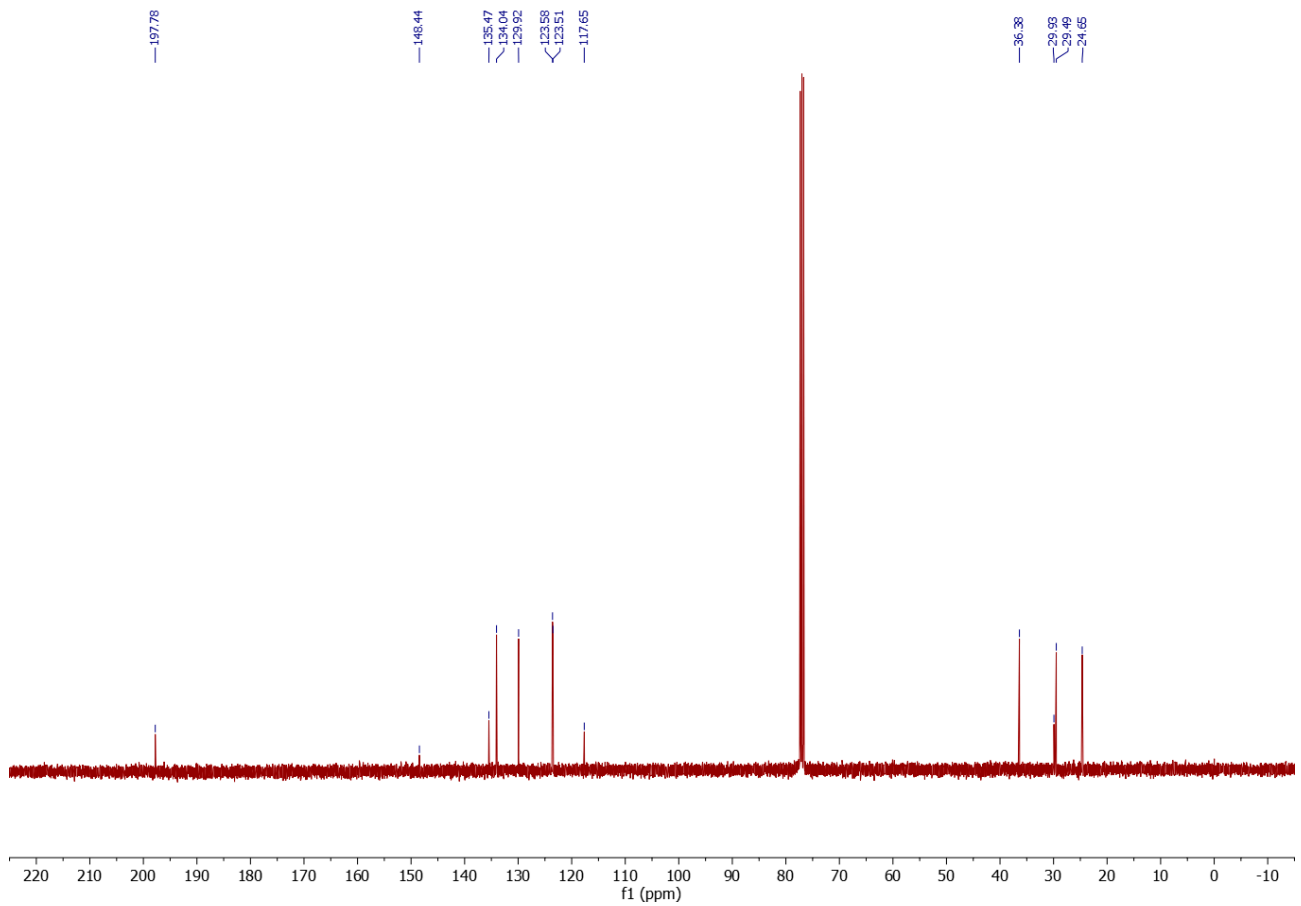

1-acetyl-2-(*p*-tolyl)cyclopropane-1-carbonitrile 4ha

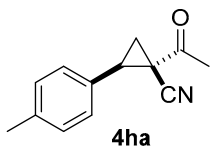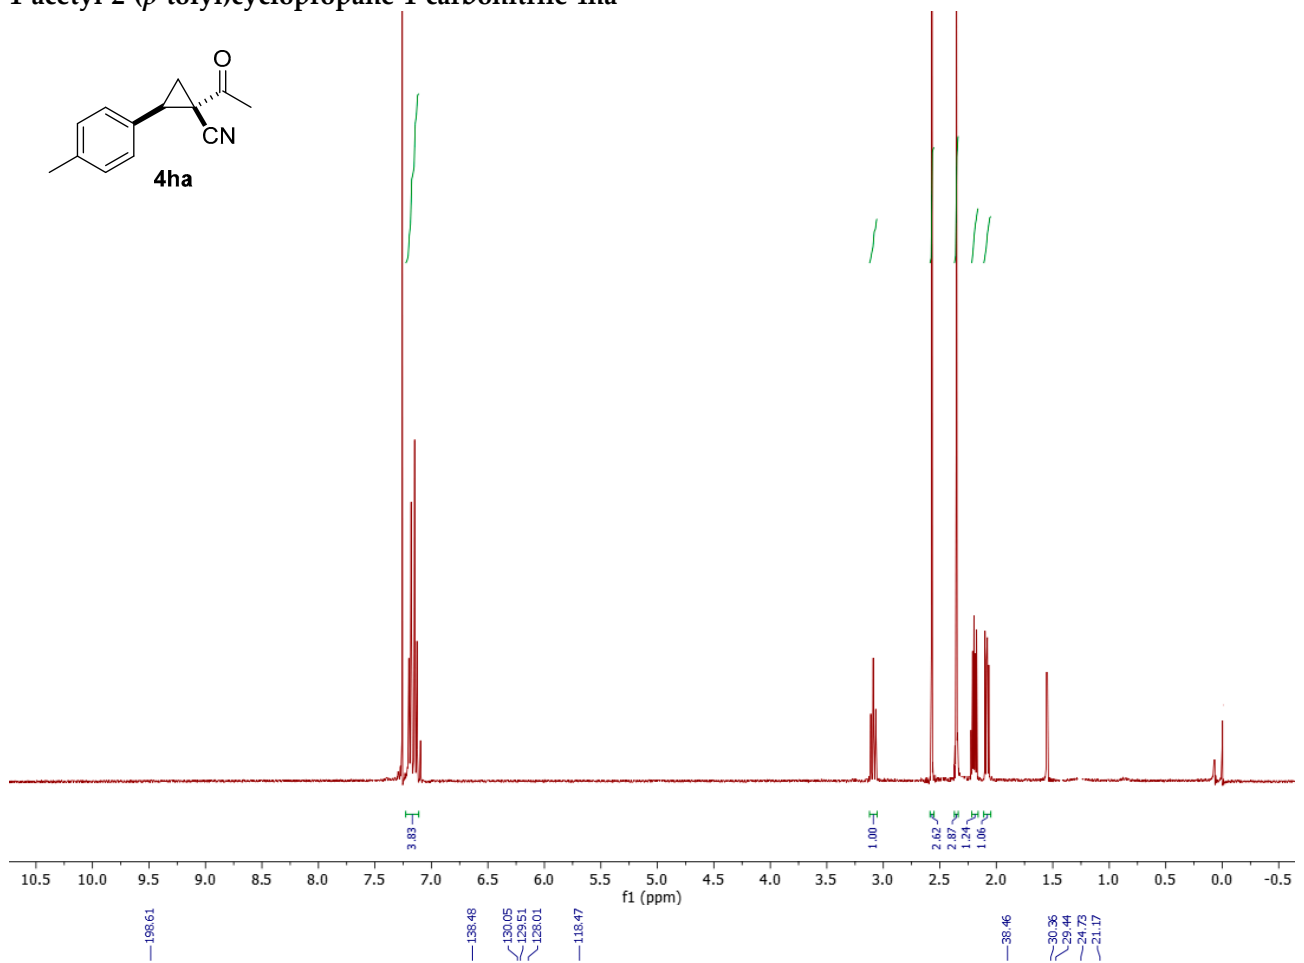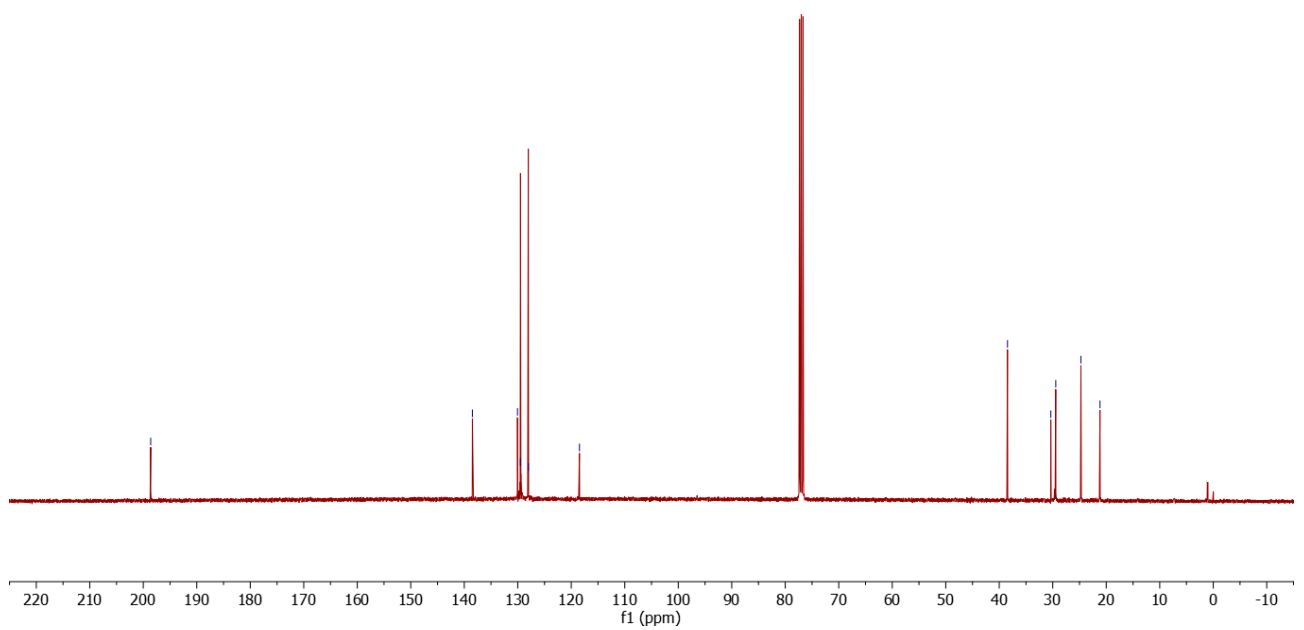

1-acetyl-2-(4-isopropylphenyl)cyclopropane-1-carbonitrile 4ia

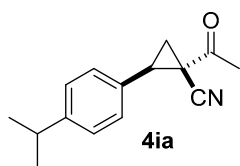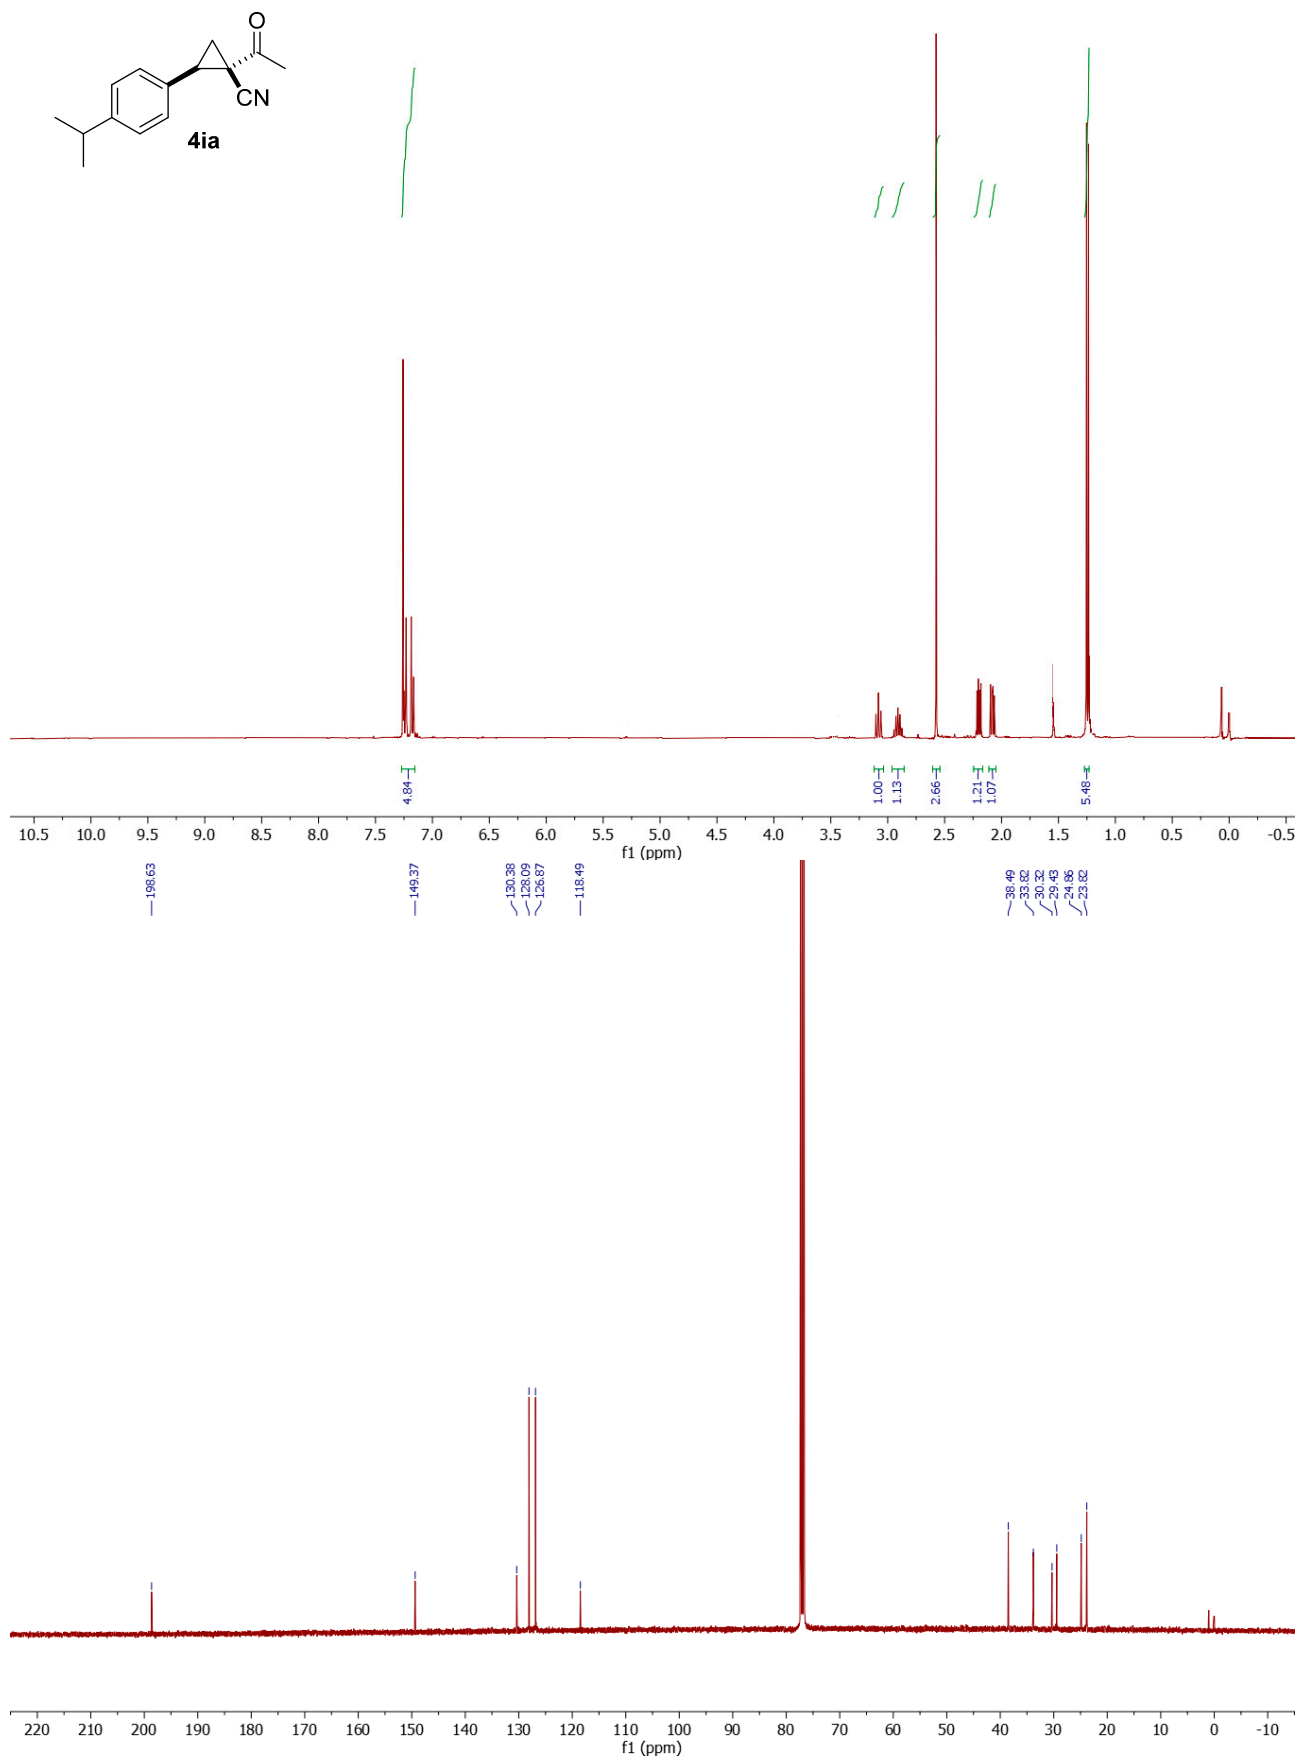

1-acetyl-2-(4-methoxyphenyl)cyclopropane-1-carbonitrile 4ja

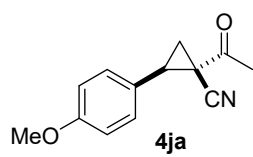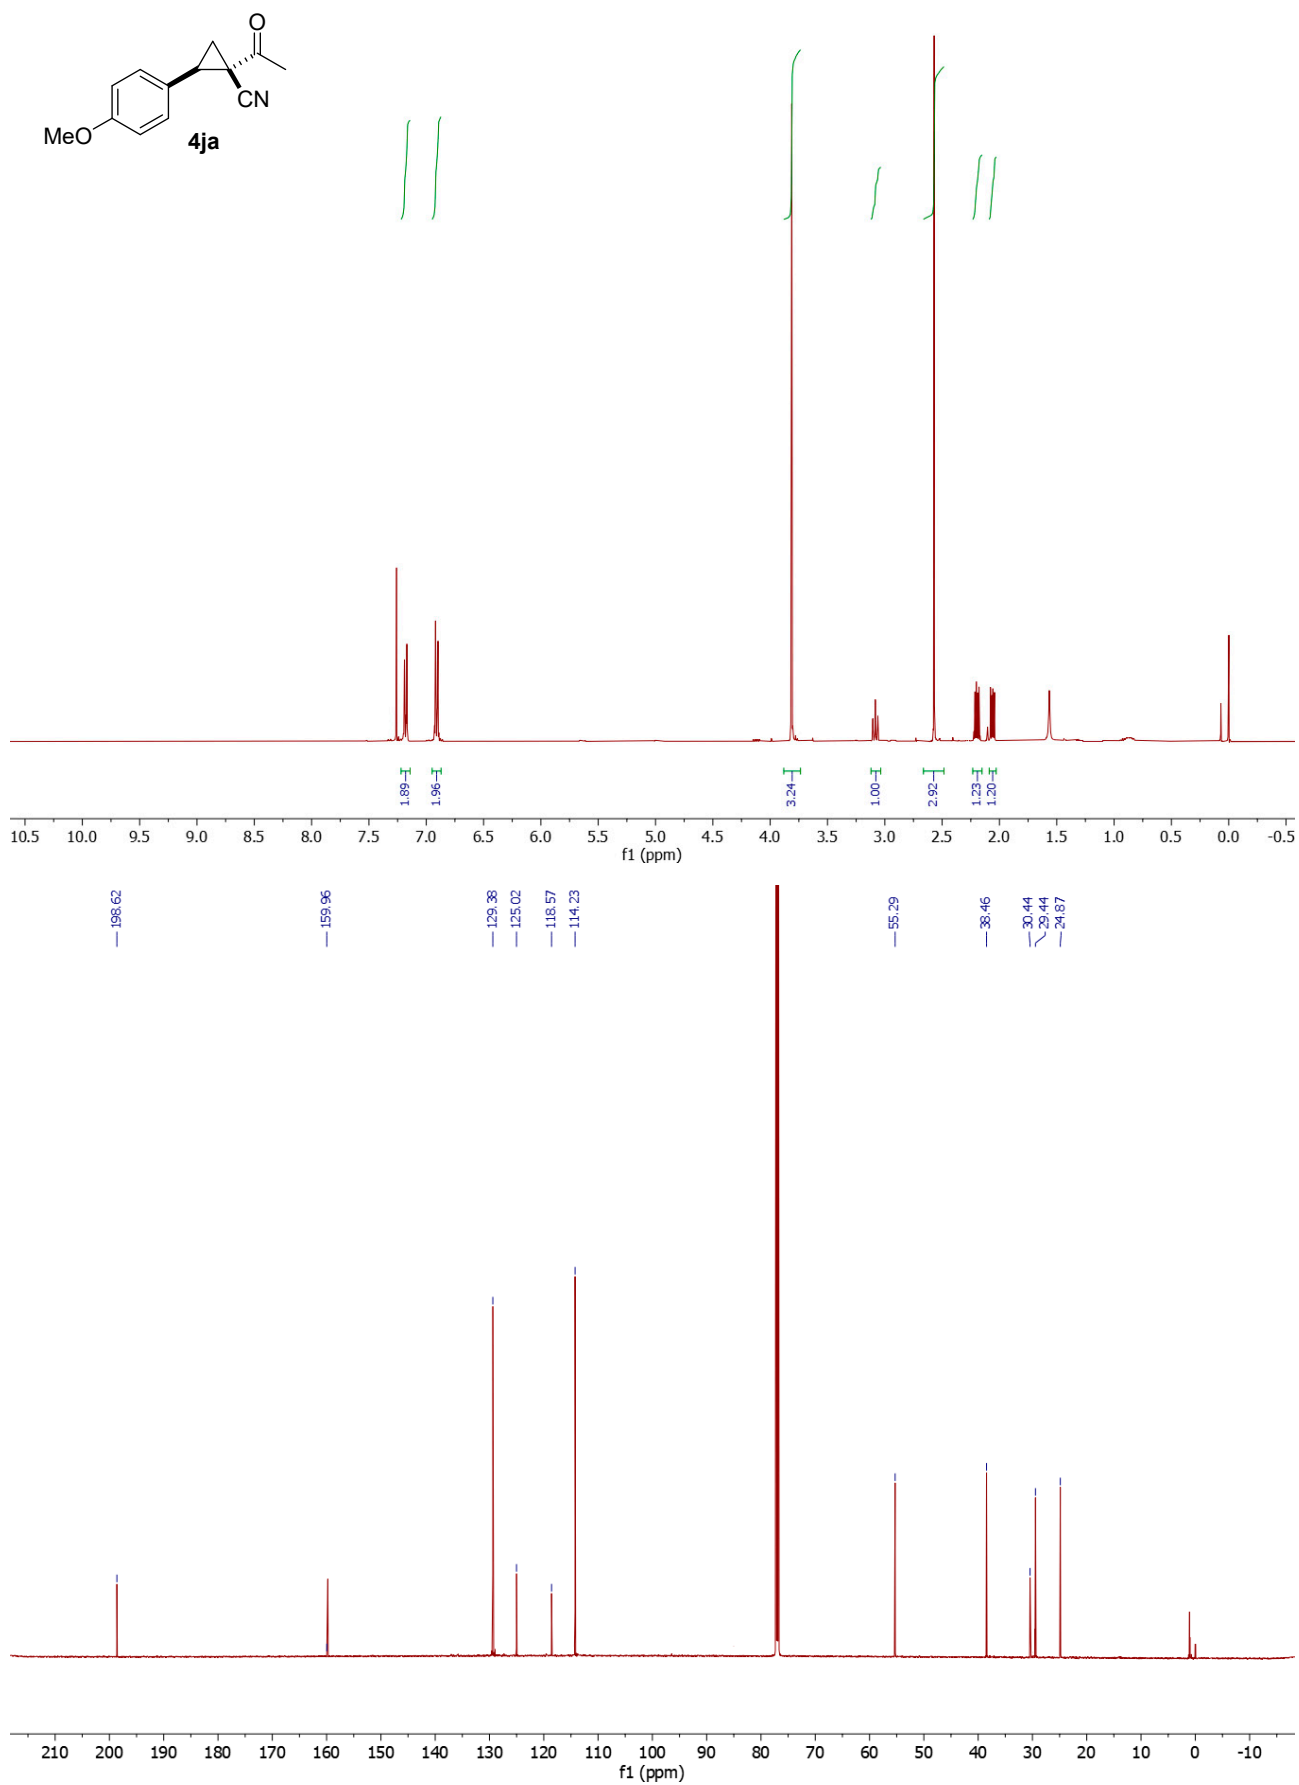

1-acetyl-2-(naphthalen-2-yl)cyclopropane-1-carbonitrile 4ka

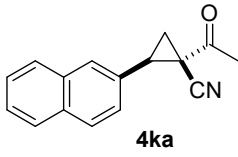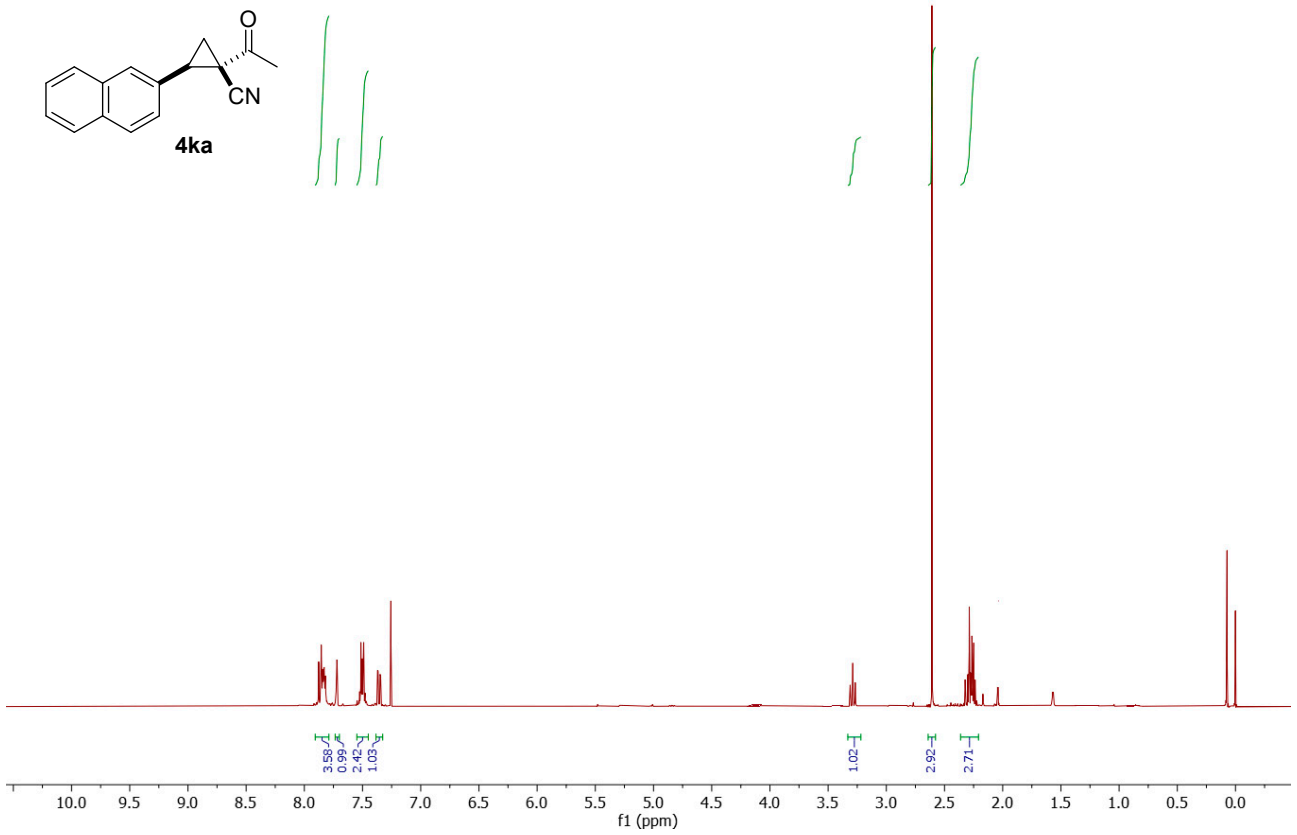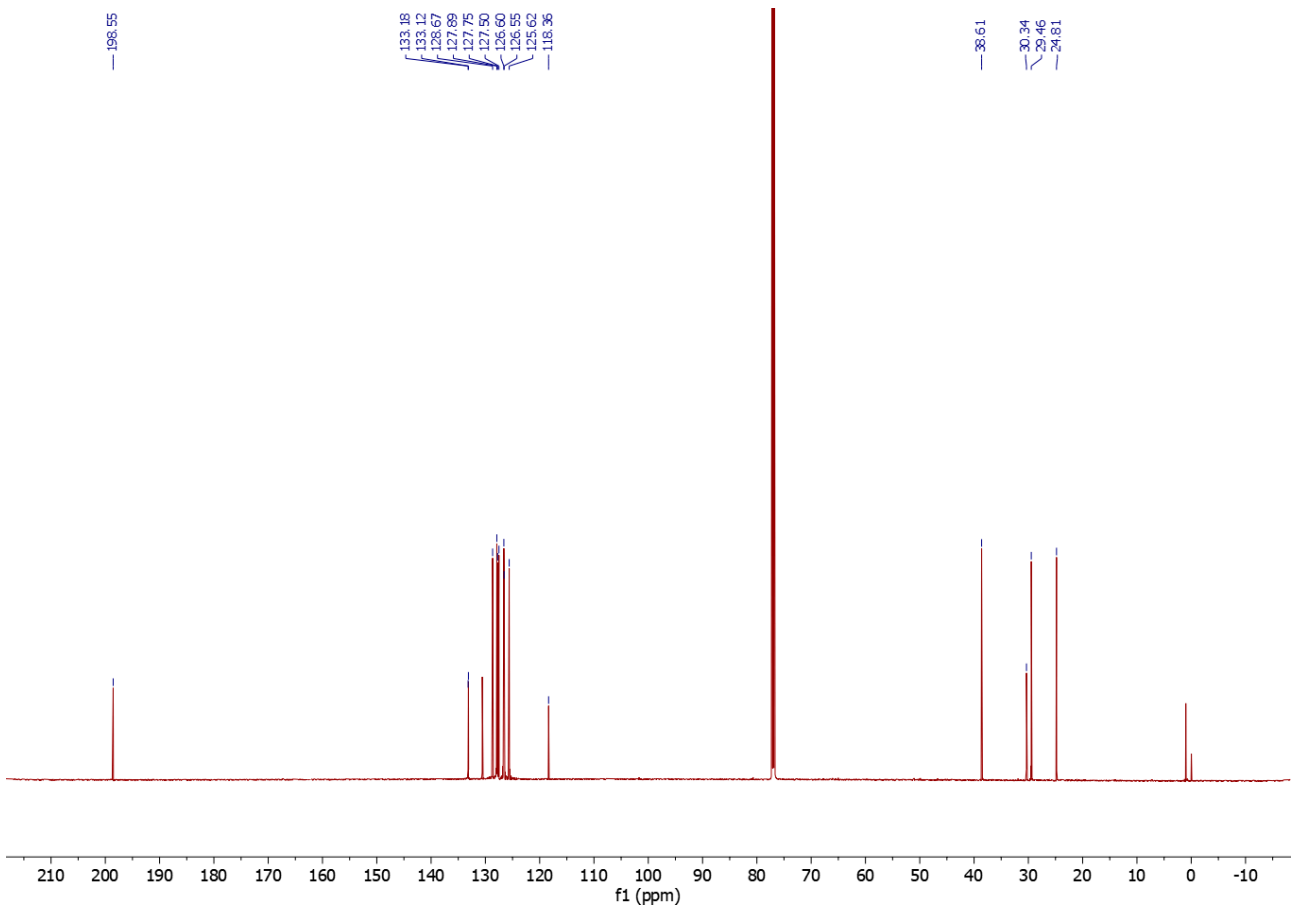



S-(3,3-dicyano-1-phenylpropyl) ethanethioate 3aa

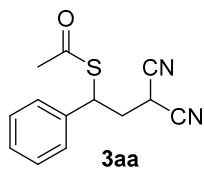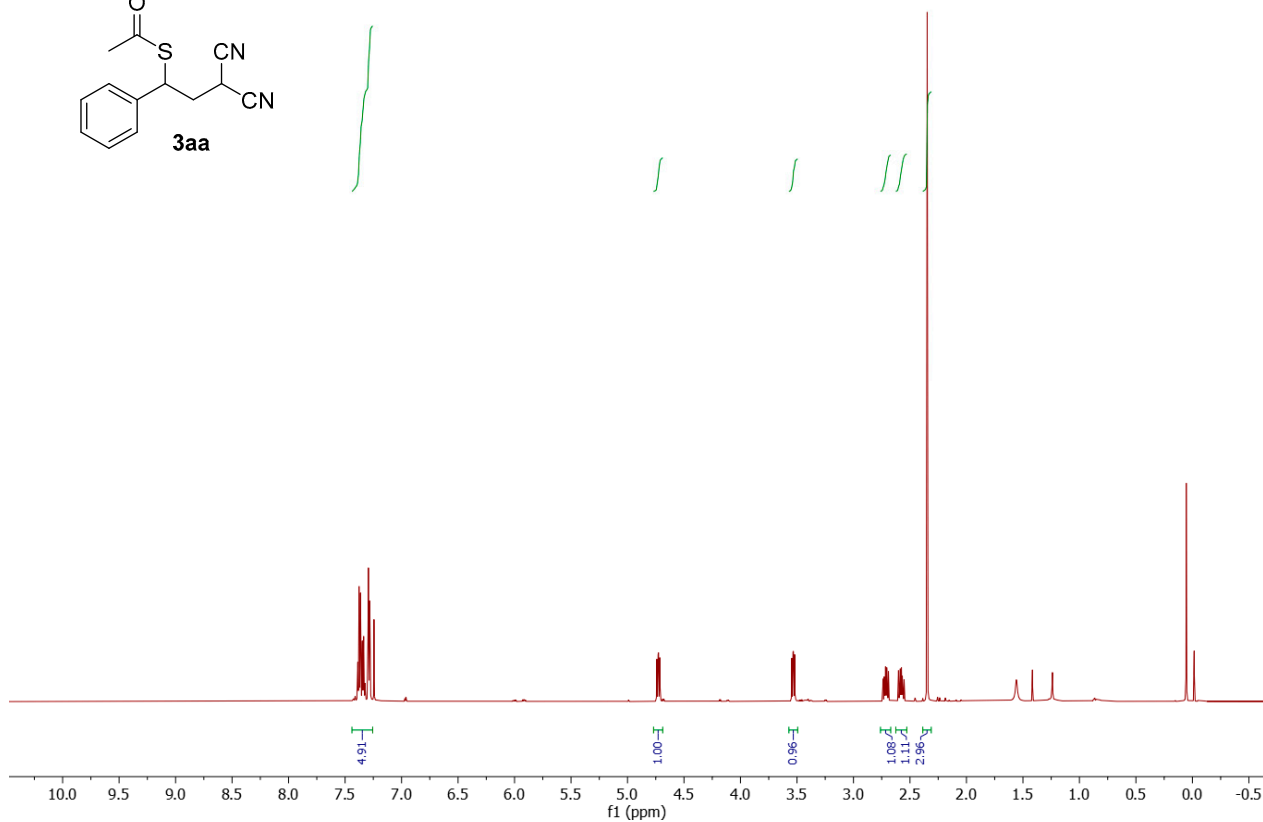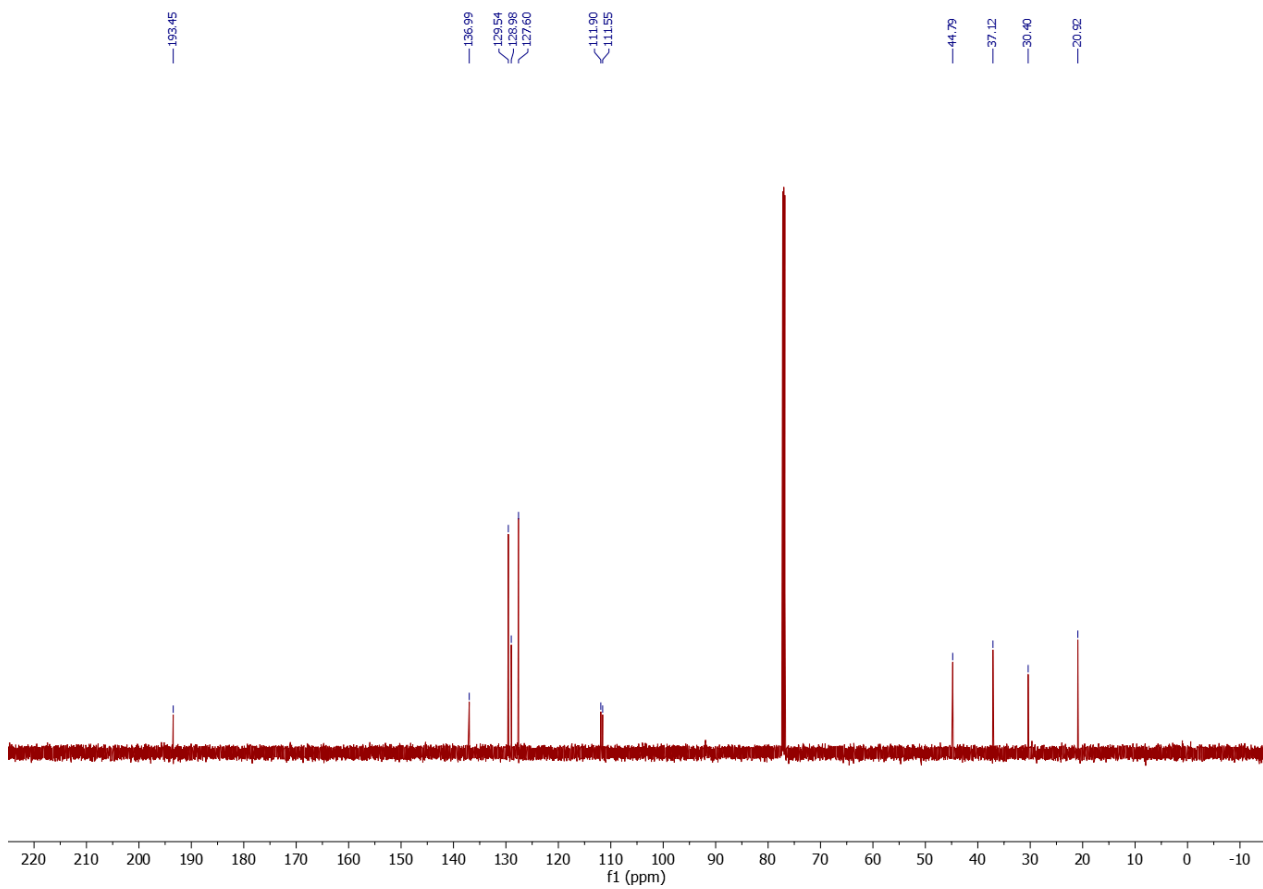

S-(1-(4-bromophenyl)-3,3-dicyanopropyl) ethanethioate 3ba

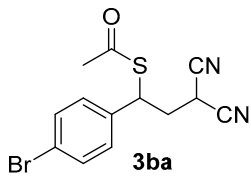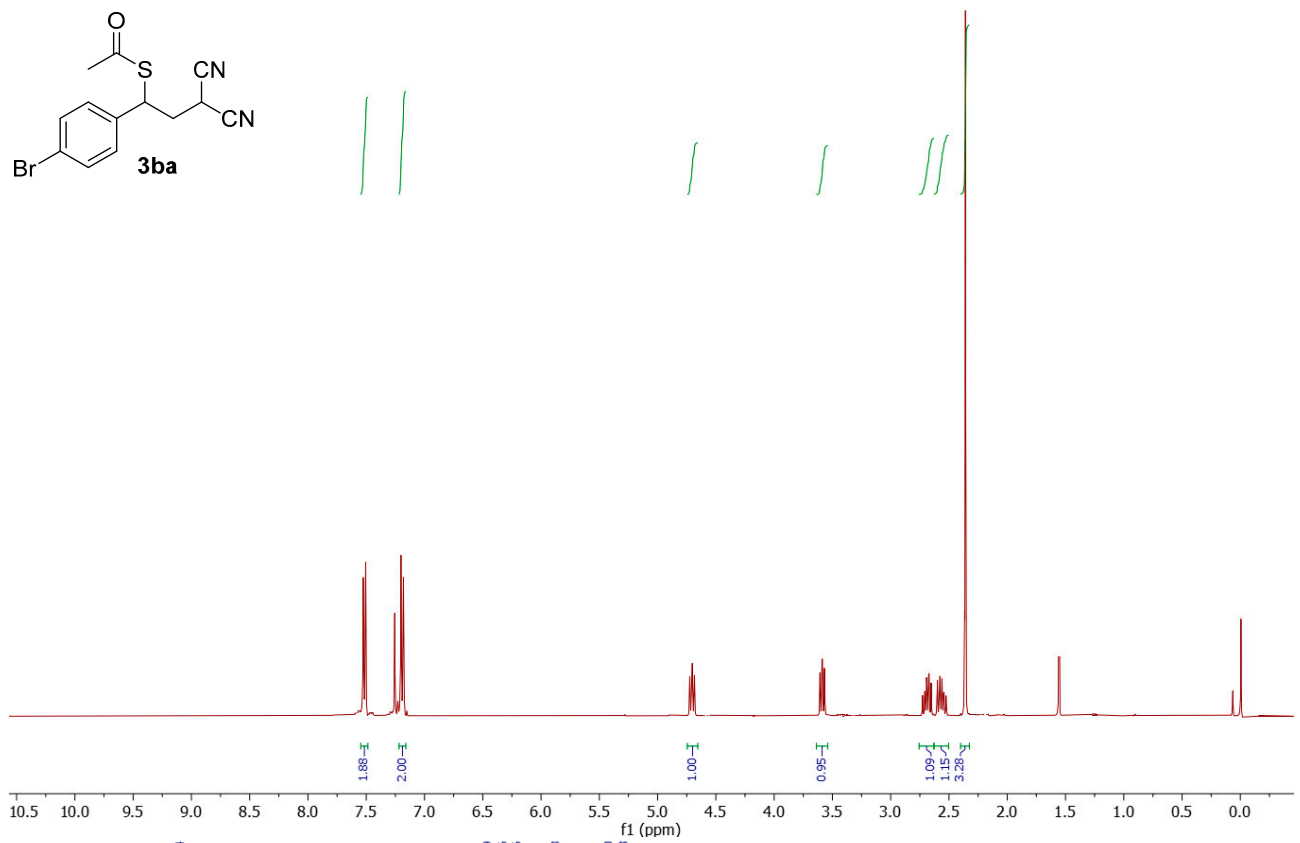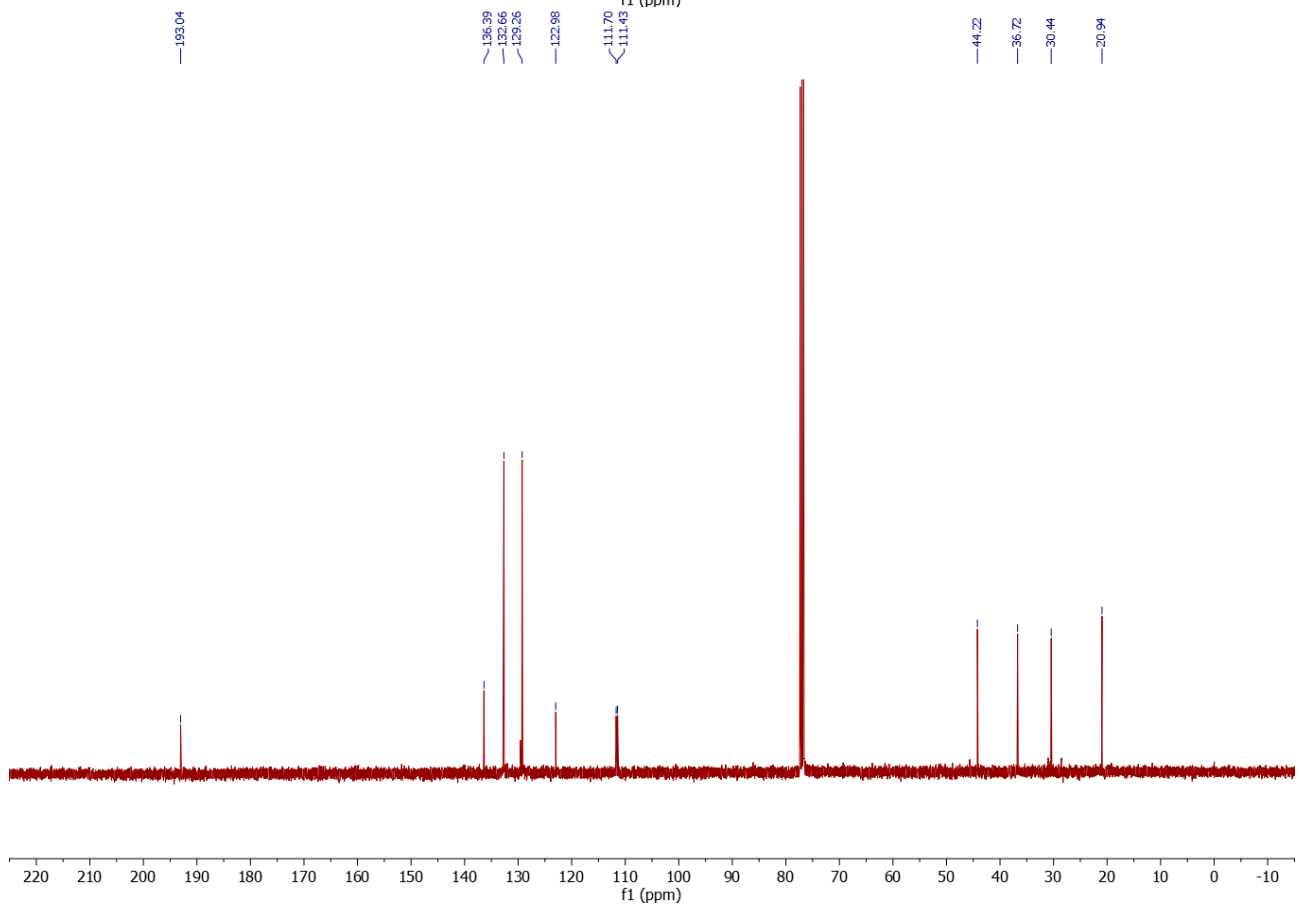

S-(1-(3-chlorophenyl)-3,3-dicyanopropyl) ethanethioate 3da

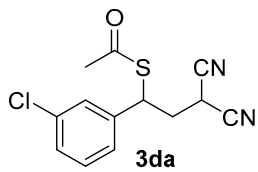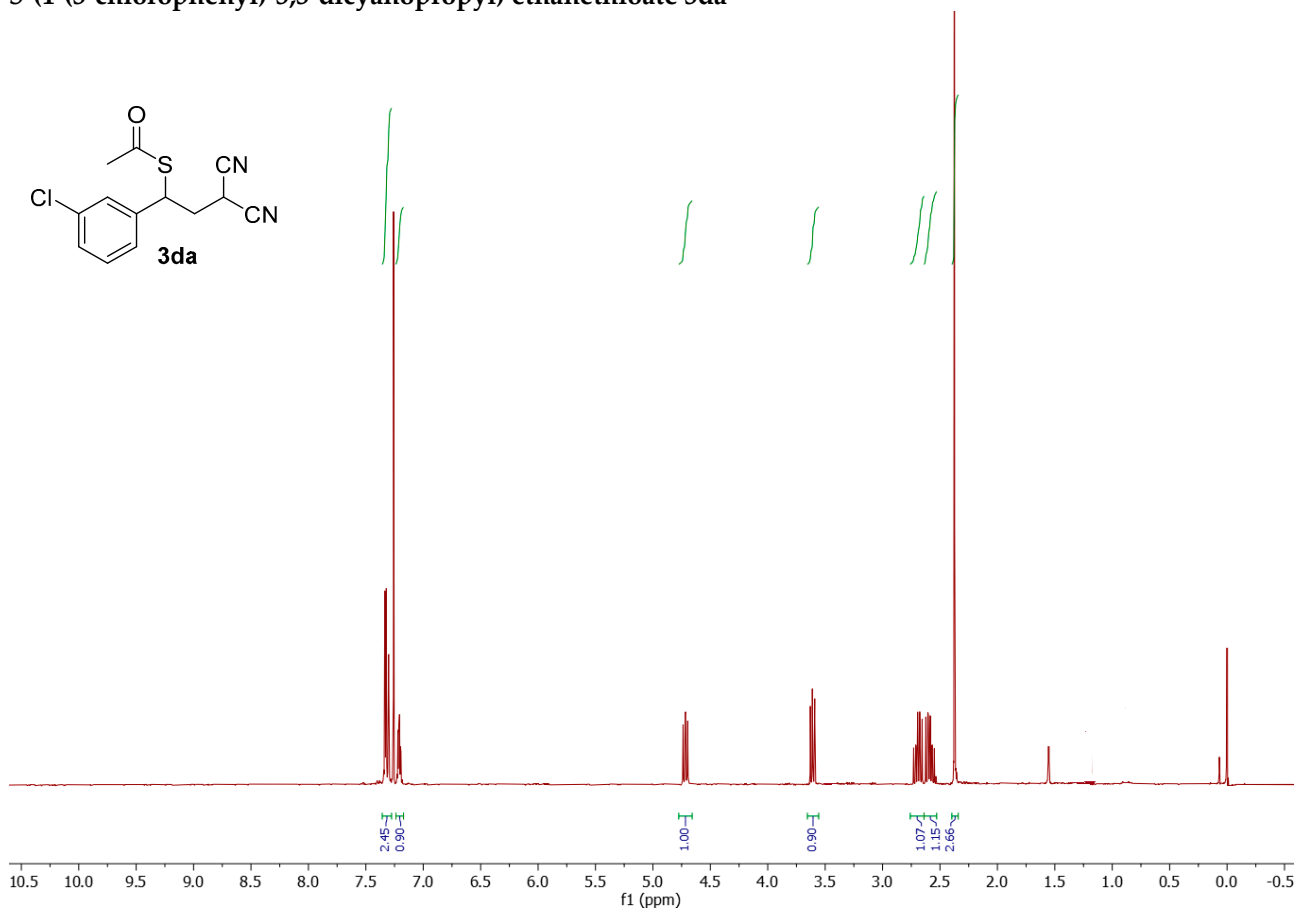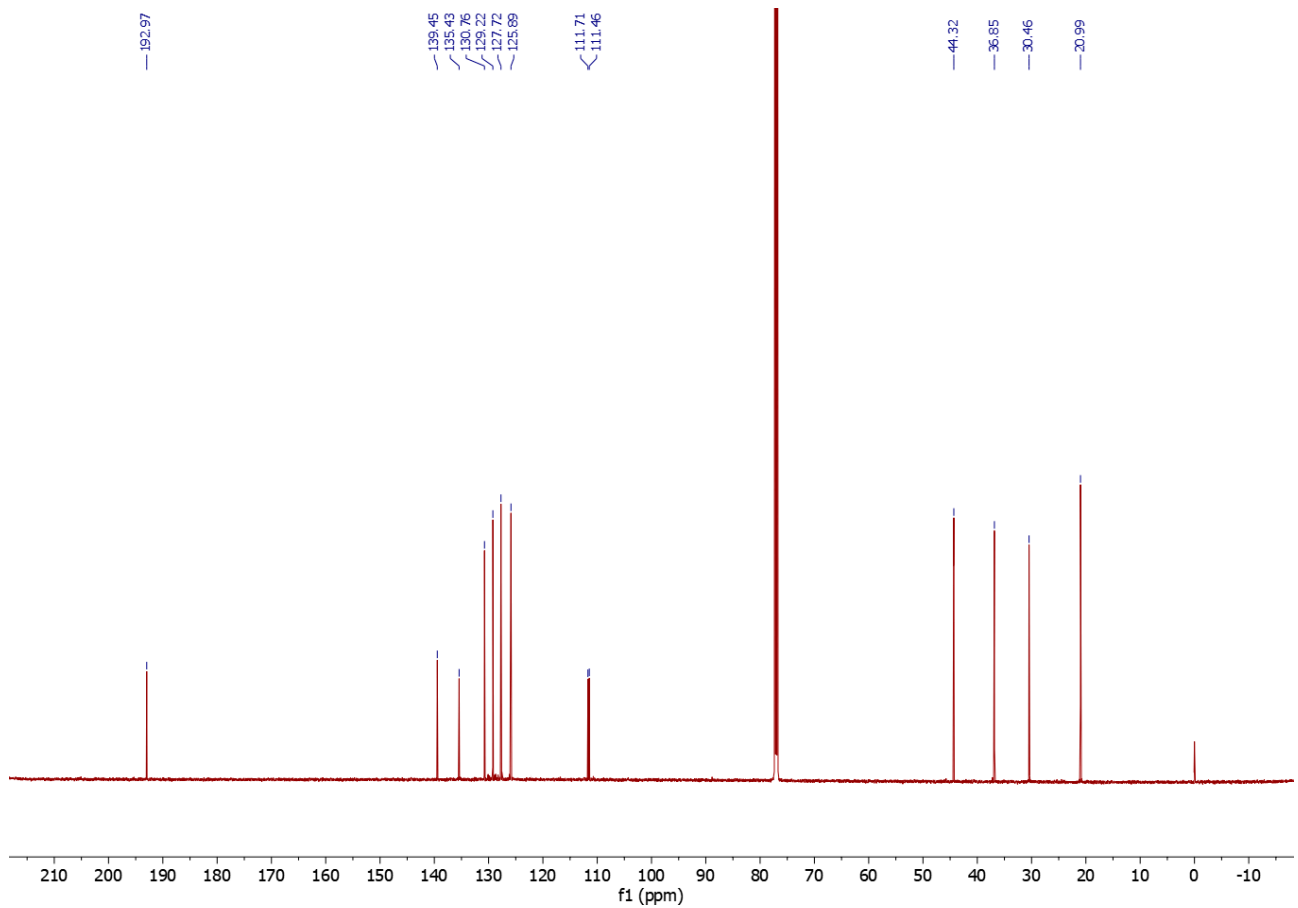

**S-(1-(4-chlorophenyl)-3,3-dicyanopropyl) ethanethioate 3fa**

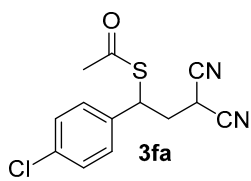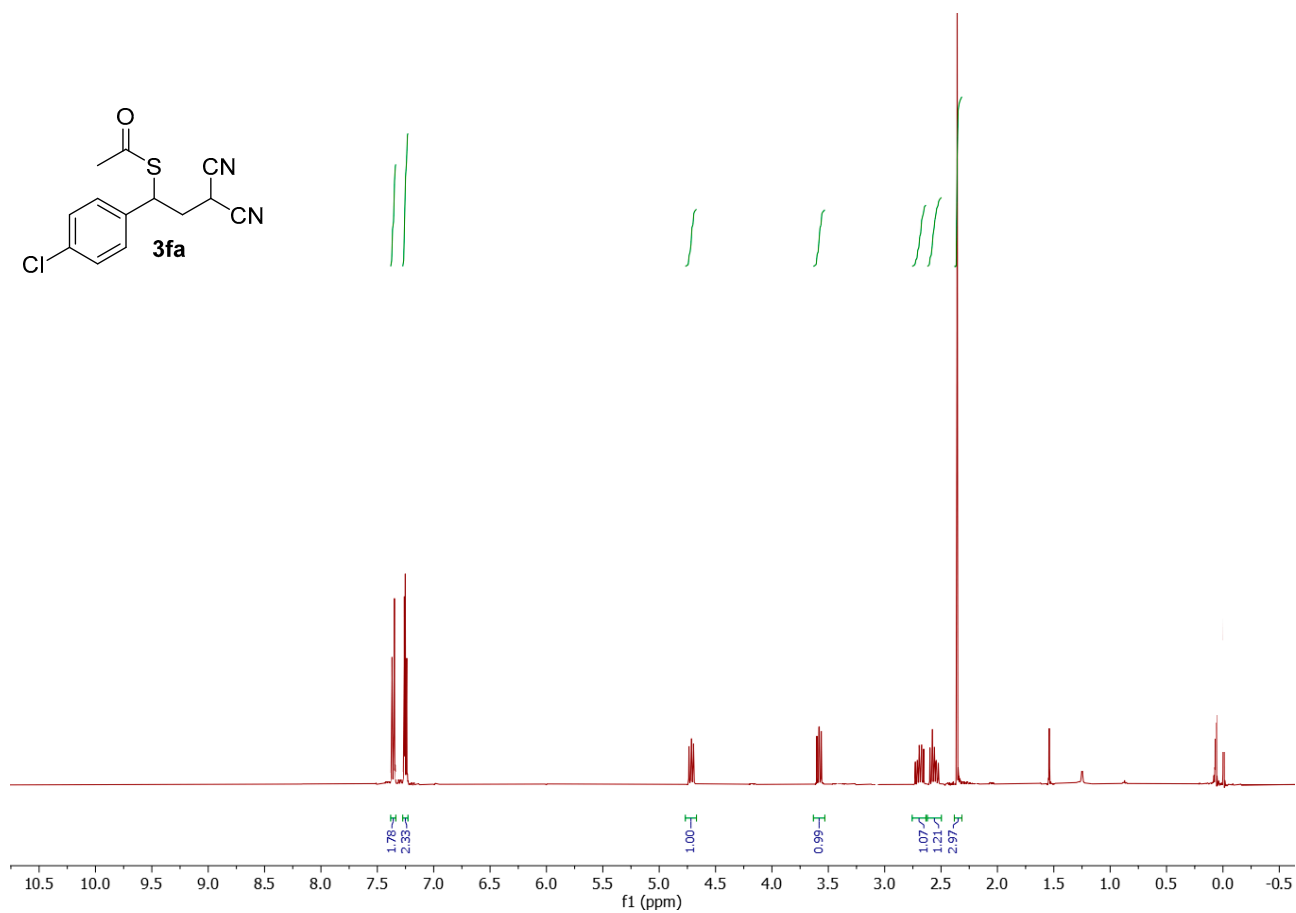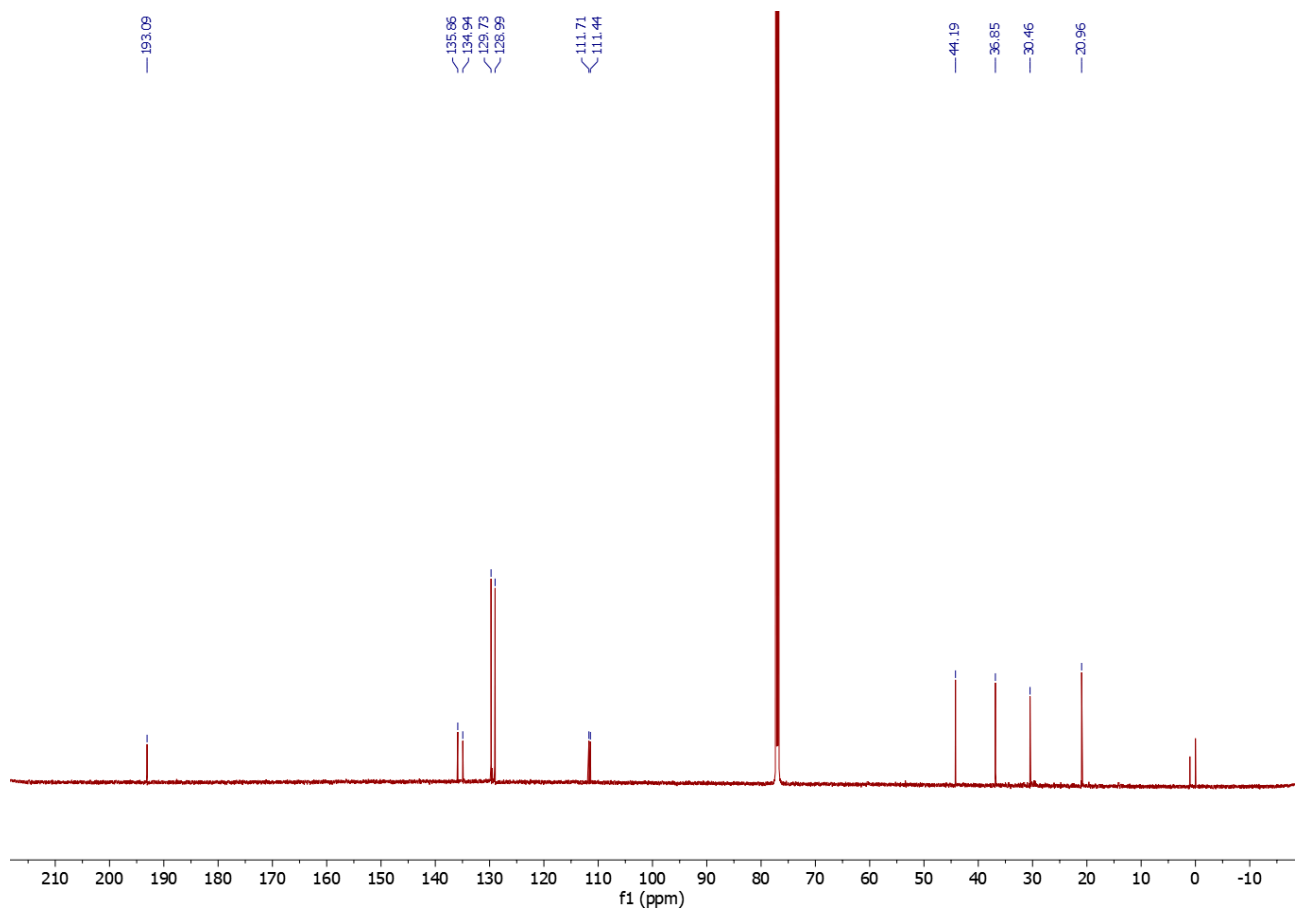

S-(3,3-dicyano-1-(3-nitrophenyl)propyl) ethanethioate 3ga

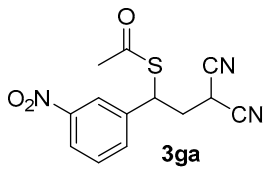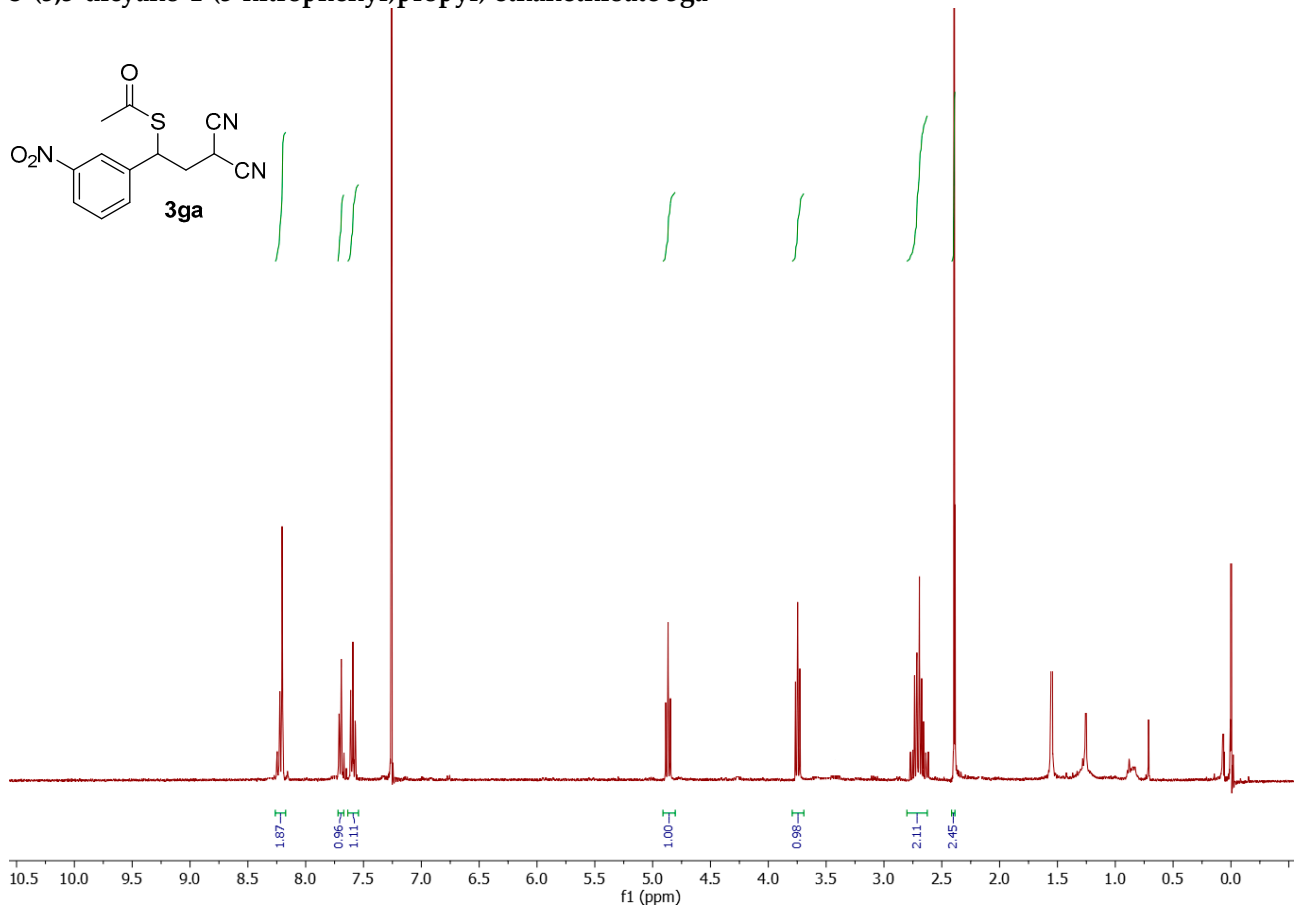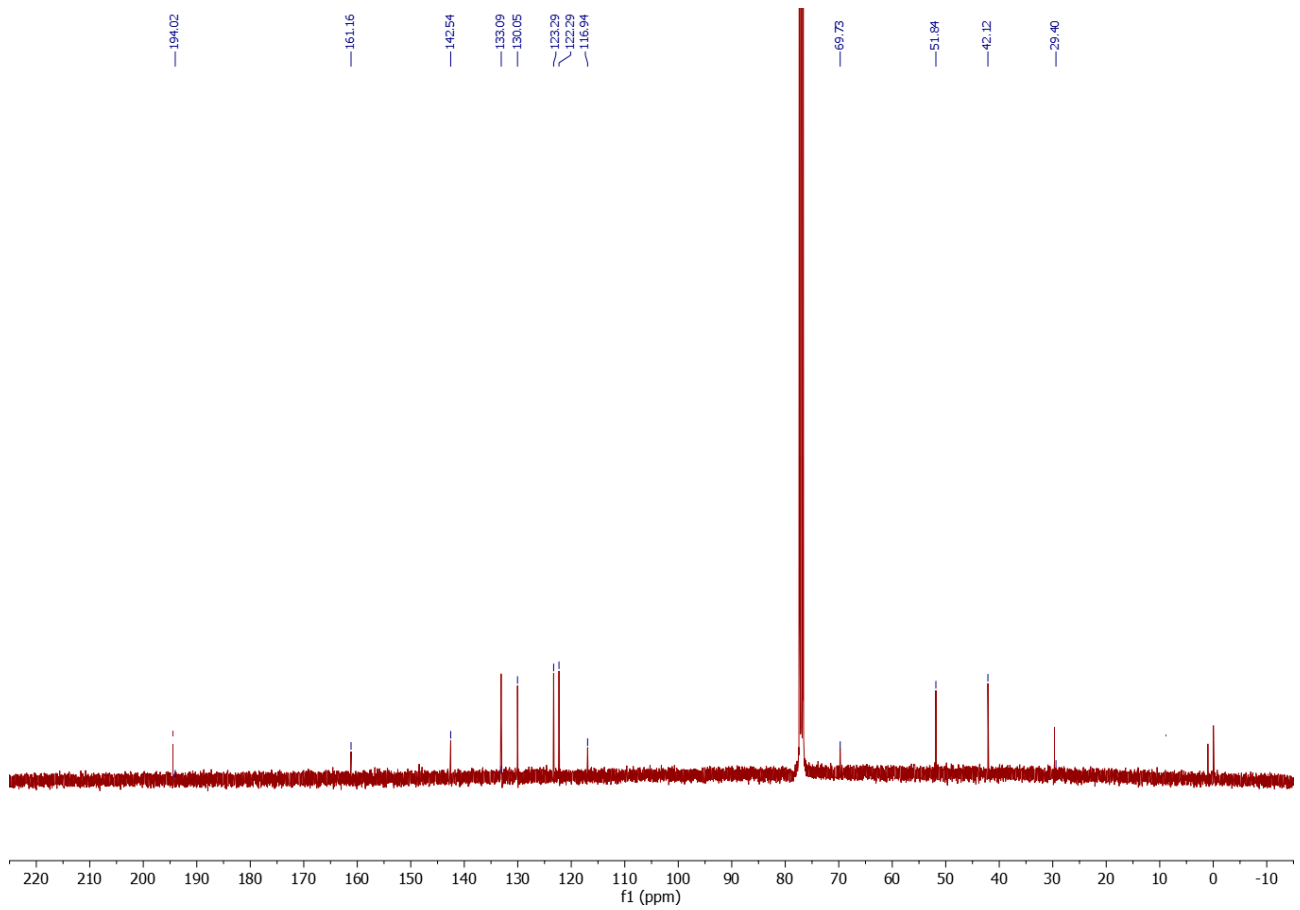

S-(3,3-dicyano-1-(p-tolyl)propyl) ethanethioate 3ha

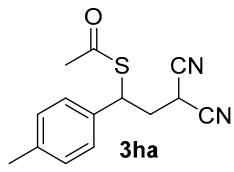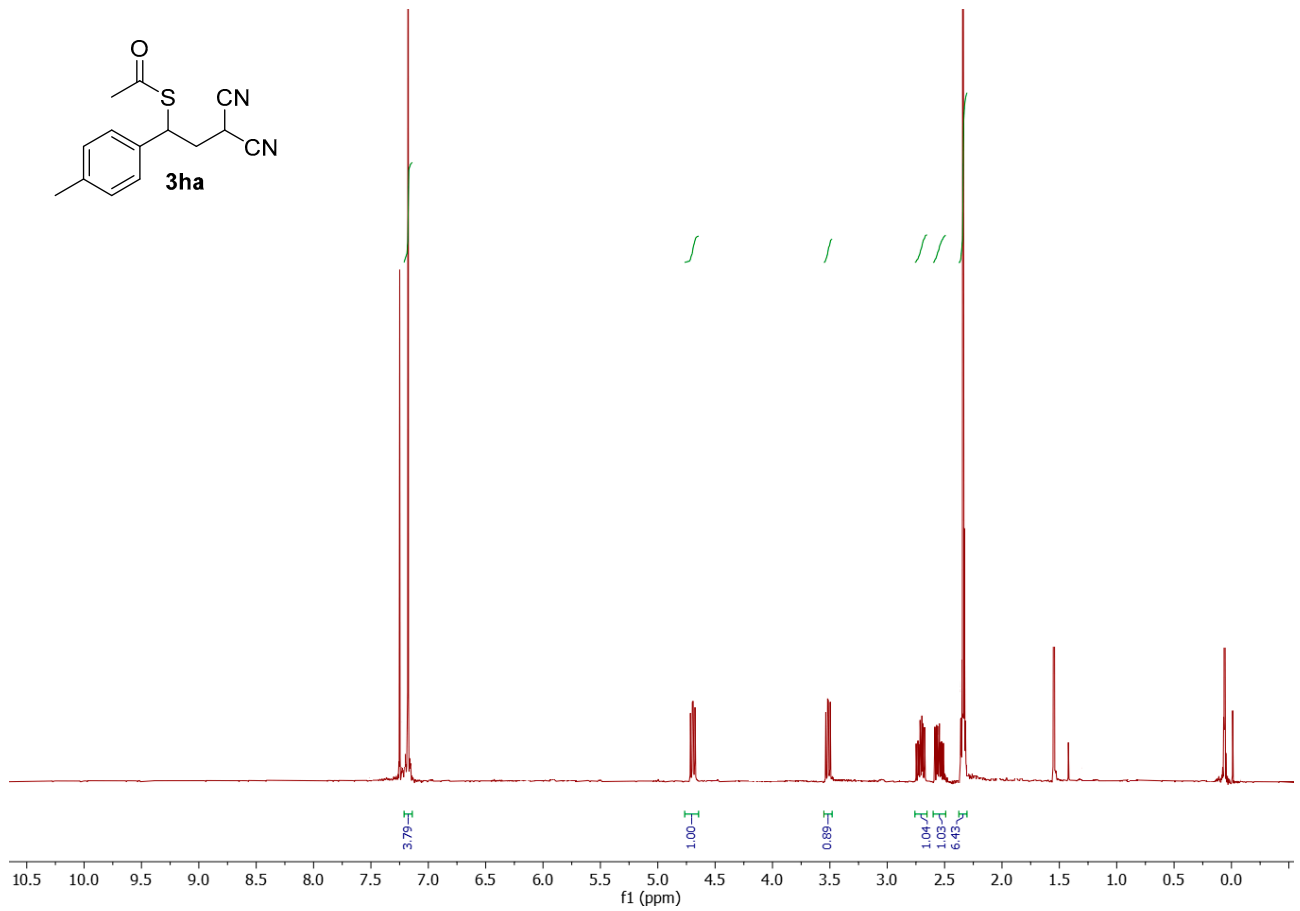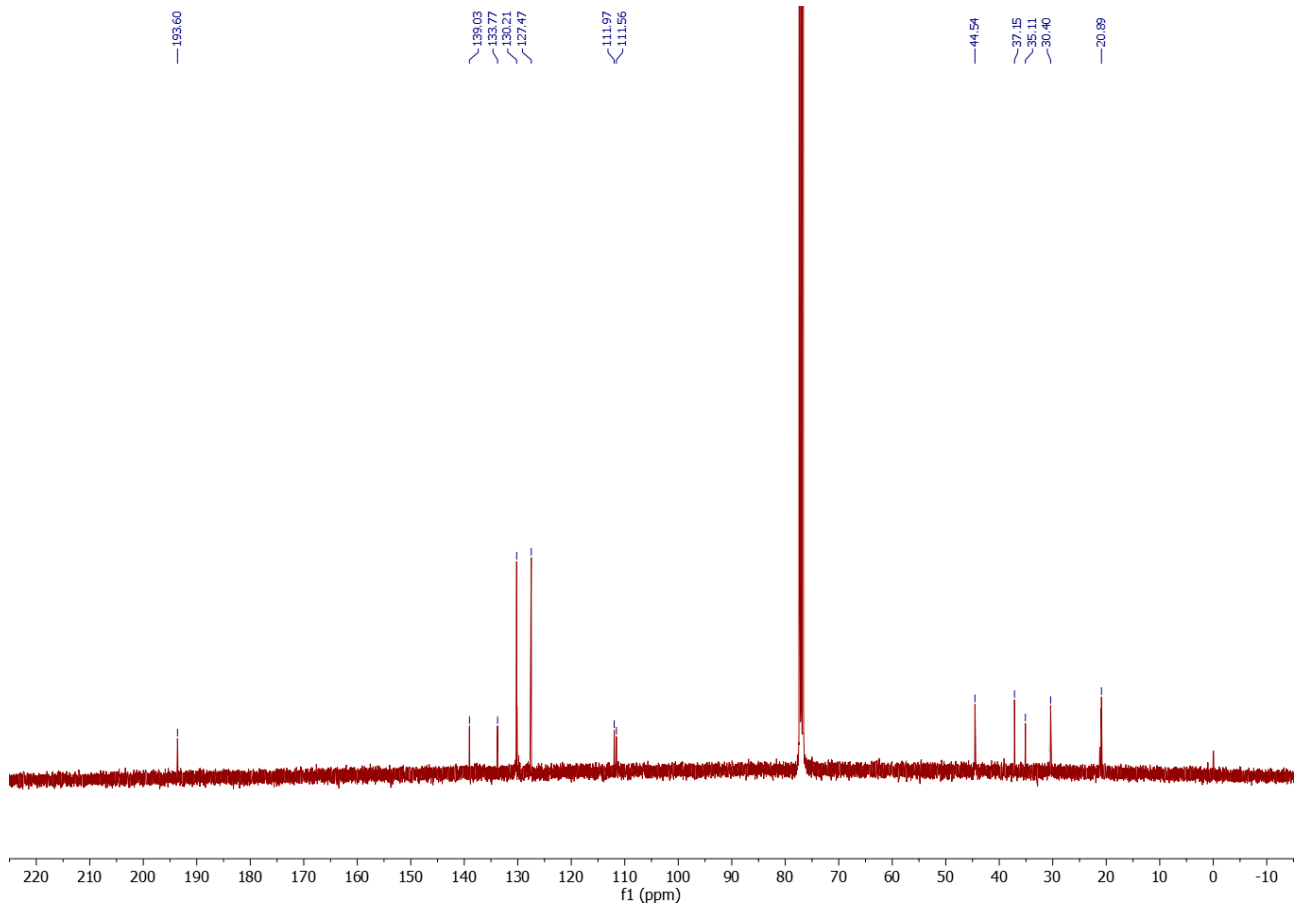

S-(3,3-dicyano-1-(4-isopropylphenyl)propyl) ethanethioate 3ia

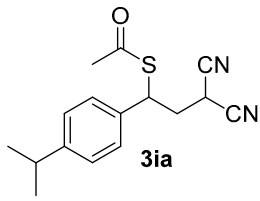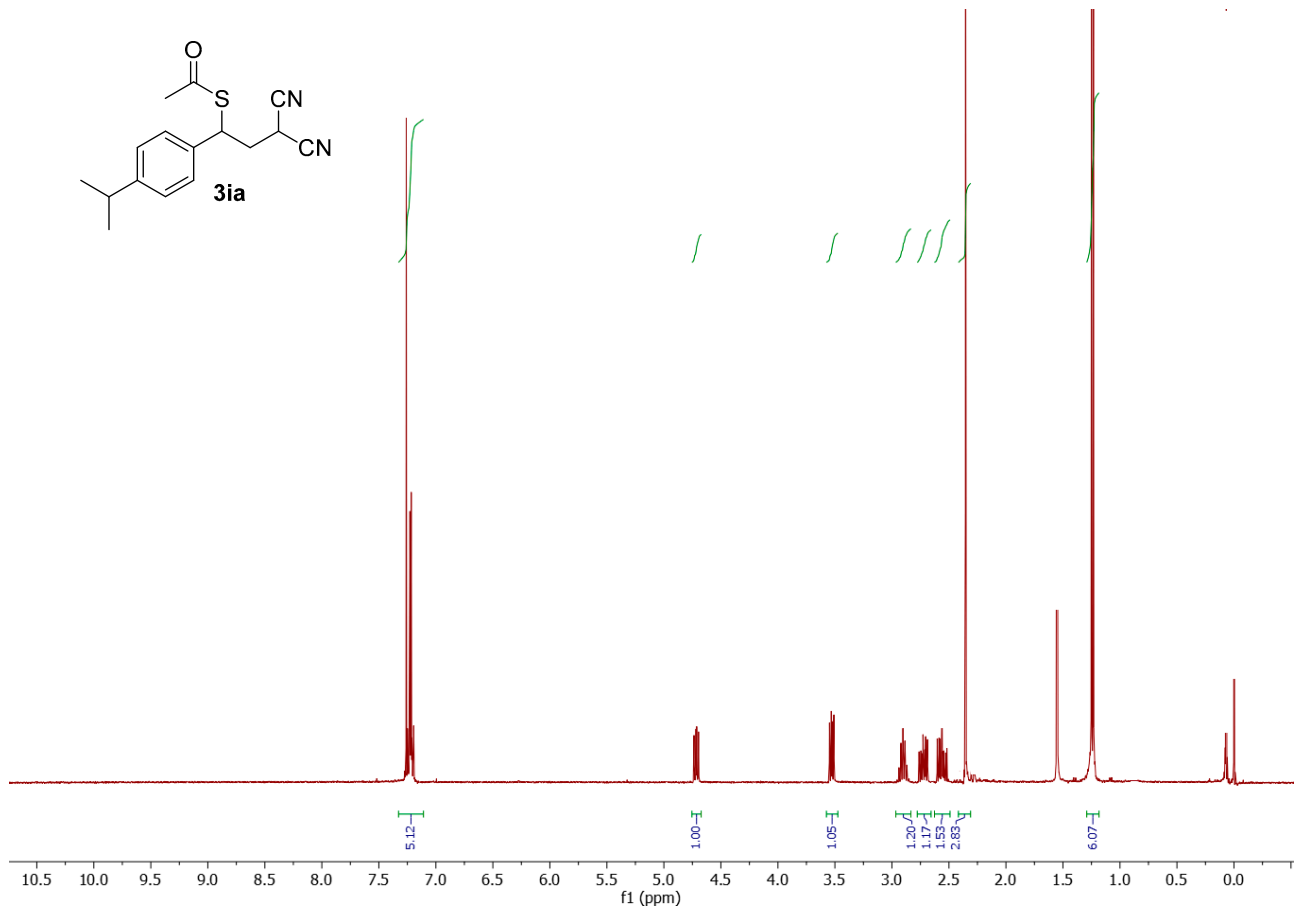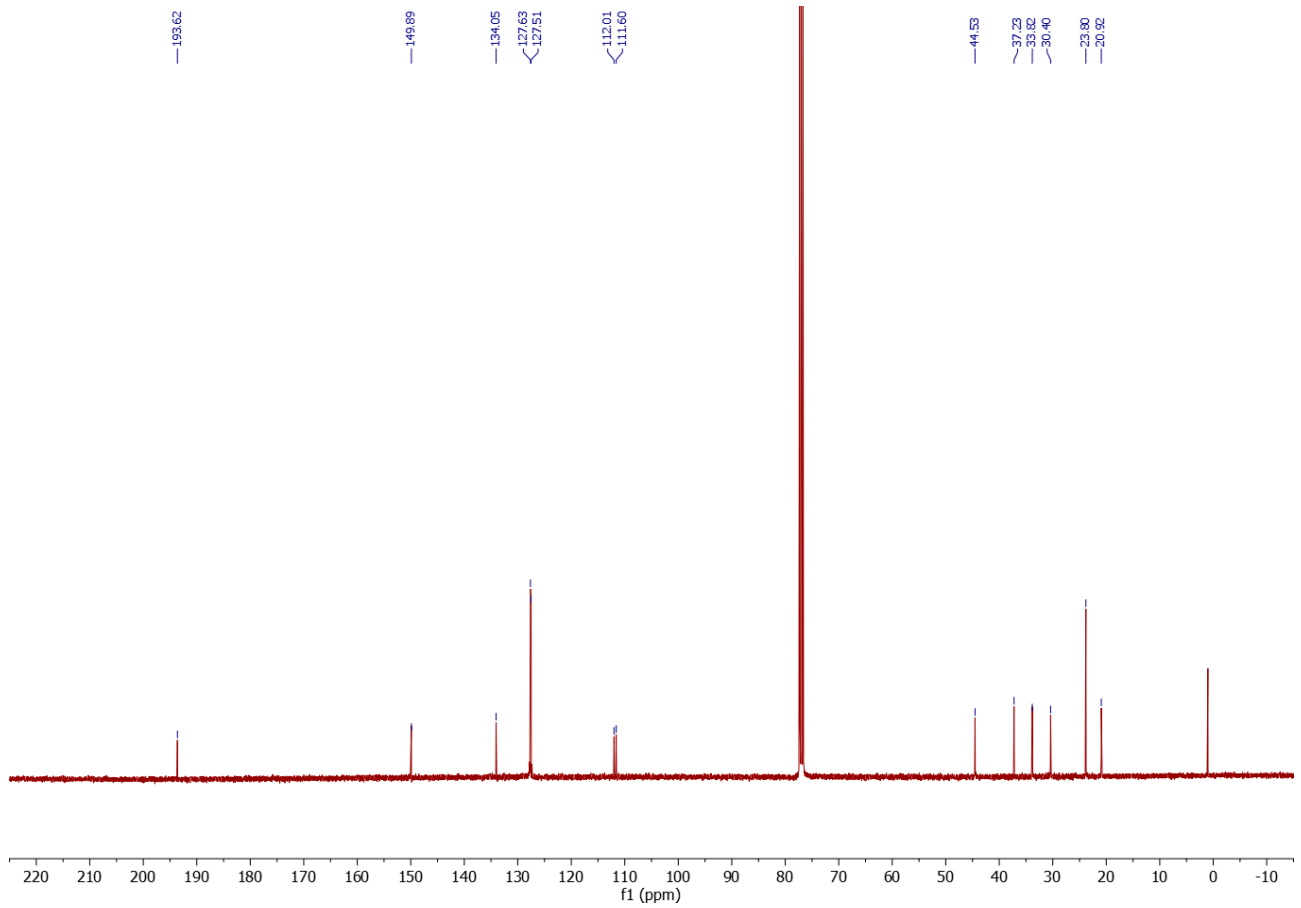

**S-(3,3-dicyano-1-(4-methoxyphenyl)propyl) ethanethioate 3ja**

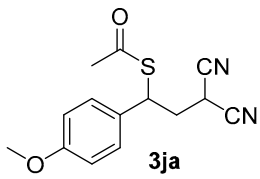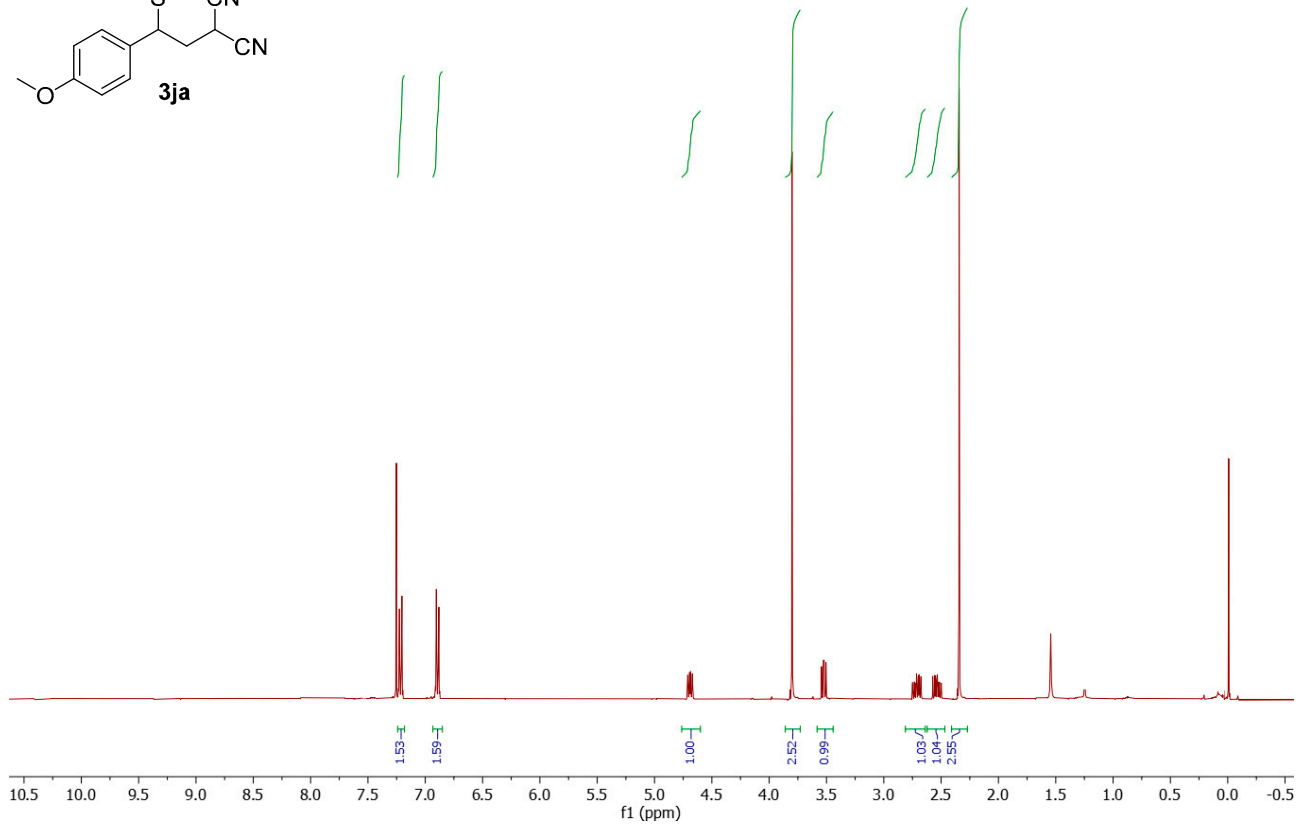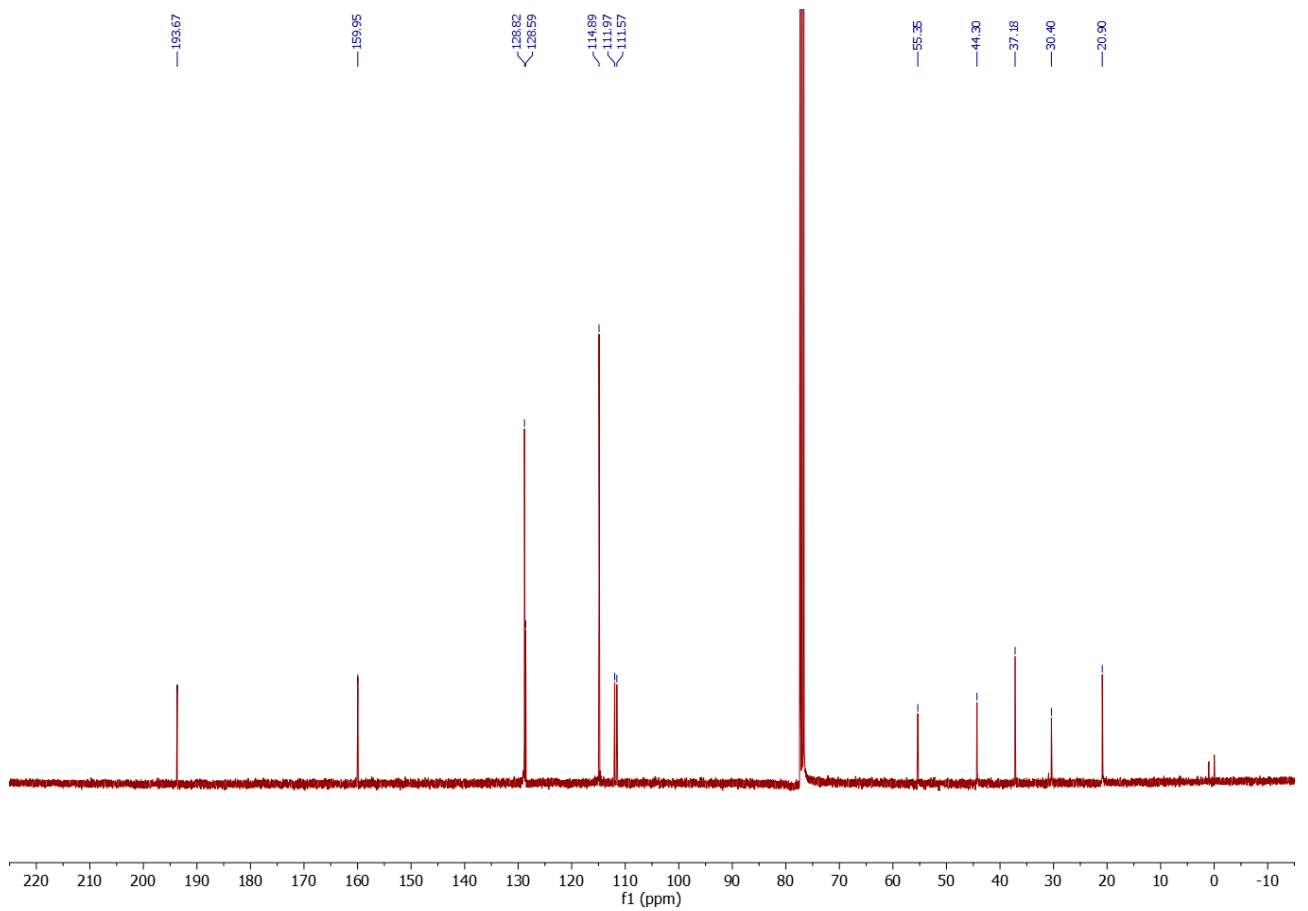



**S-(3,3-dicyano-1-phenylpropyl) benzothioate 3ab**

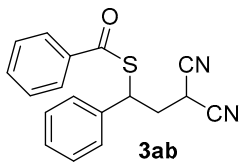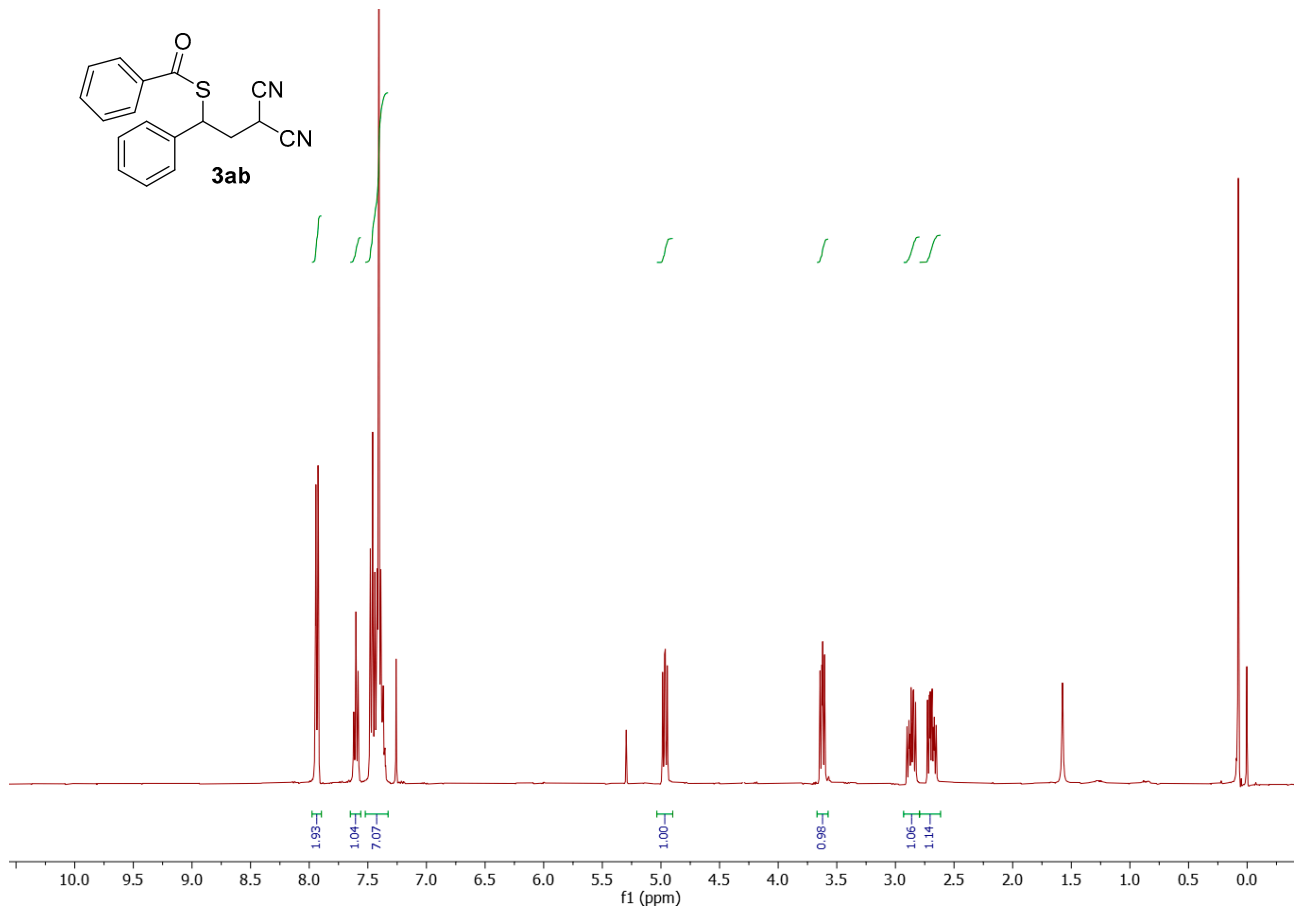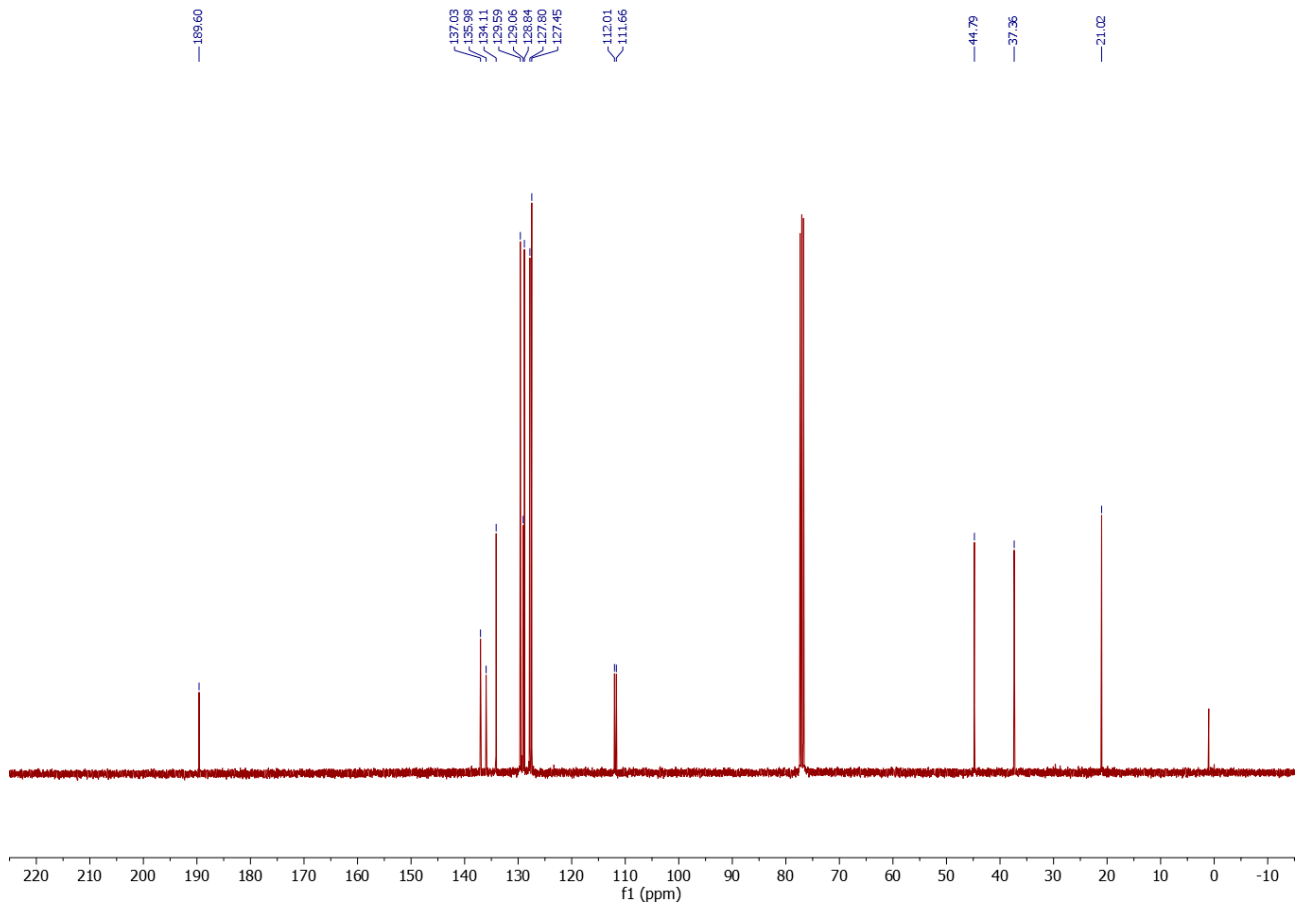

S-(3,3-dicyano-1-(4-methoxyphenyl)propyl) benzothioate 3jb

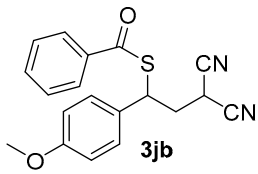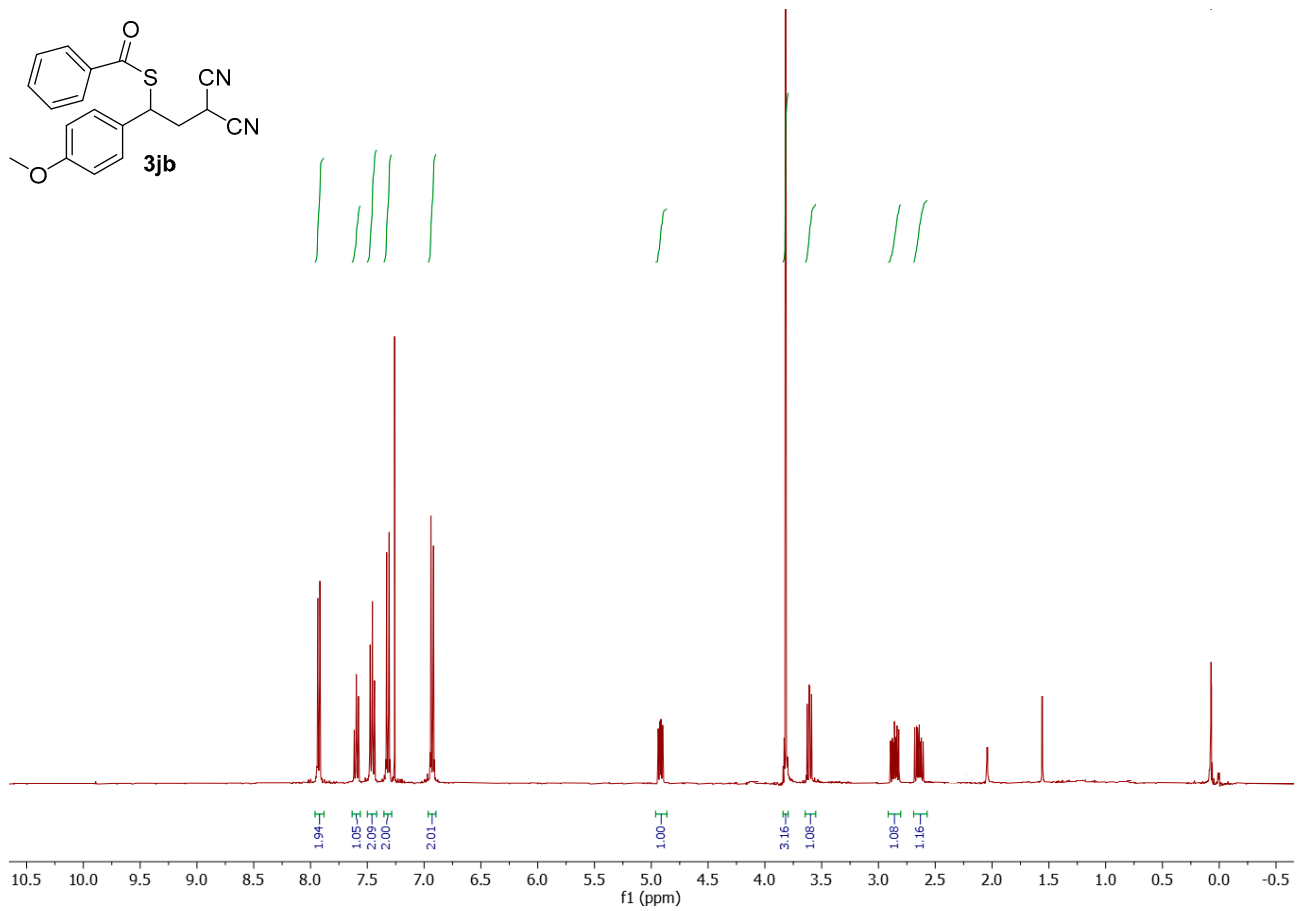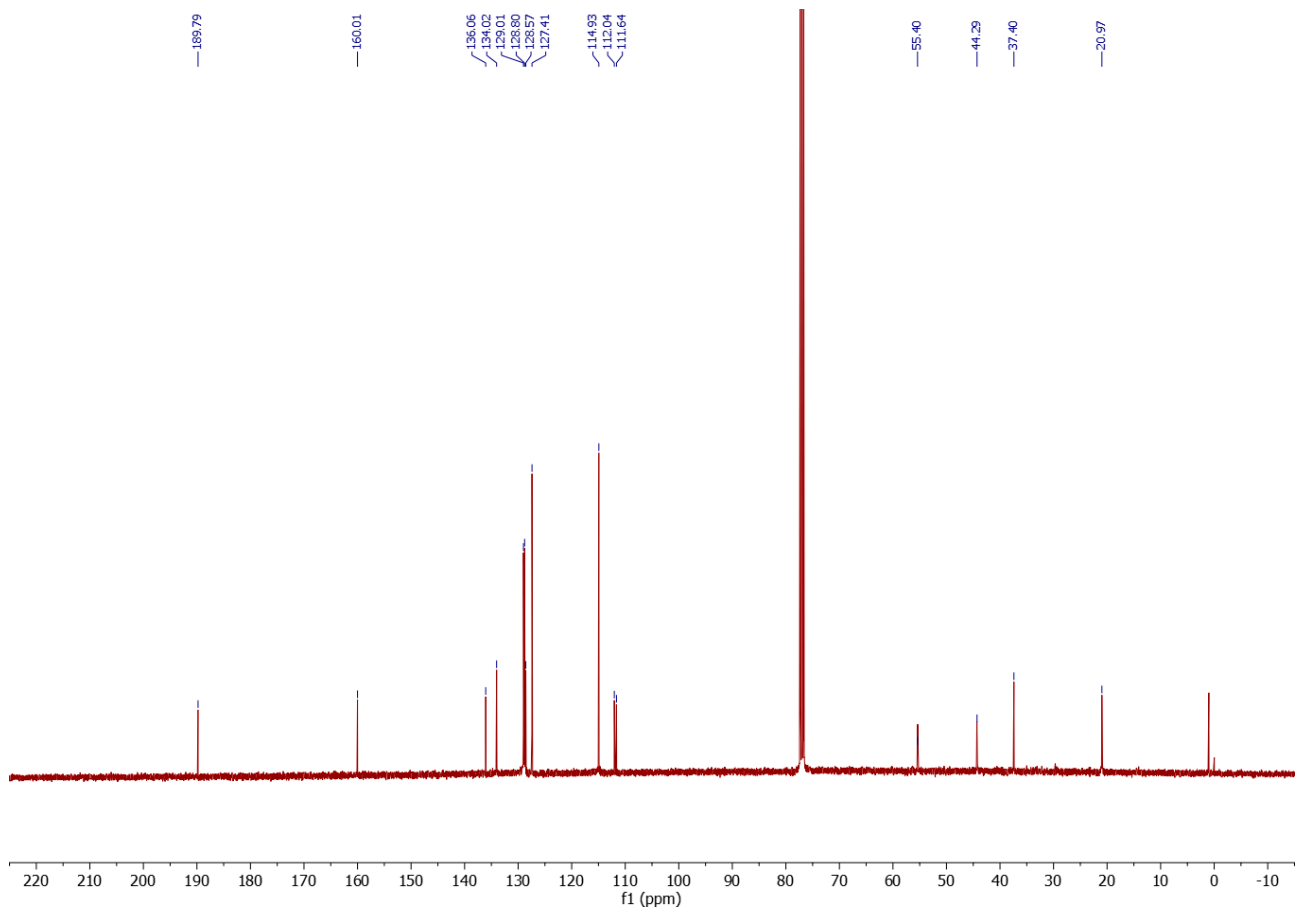

Supplement: s1 [file s1]
